# 1 Structure of the complete, membrane-assembled COPII coat 2 reveals a complex interaction network.

3 Joshua Hutchings<sup>1,5</sup>, Viktoriya G. Stancheva<sup>2</sup>, Nick R. Brown<sup>1,3</sup>, Alan C.M. Cheung<sup>1,4</sup>, Elizabeth A. Miller<sup>2</sup>  
4 and Giulia Zanetti\*<sup>1</sup>.

5 <sup>1</sup>Institute of Structural and Molecular Biology, Birkbeck College, London

6 <sup>2</sup>MRC Laboratory of Molecular Biology, Cambridge

7 <sup>3</sup>Present address: The Francis Crick Institute, London

8 <sup>4</sup>Present address: School of Biochemistry at the University of Bristol

9 <sup>5</sup>Present address: Division of Biological Sciences, University of California San Diego, La Jolla, CA

10

11 \*correspondence: [g.zanetti@bbk.ac.uk](mailto:g.zanetti@bbk.ac.uk)

## 12 Abstract

13 The COPII coat mediates Endoplasmic Reticulum (ER) to Golgi trafficking for thousands of proteins. Five  
14 essential coat proteins assemble at the ER into a characteristic two-layer architecture, which recruits  
15 cargo proteins whilst sculpting membrane carriers with diverse morphologies. How coat architecture  
16 drives membrane curvature whilst ensuring morphological plasticity is largely unknown, yet is central  
17 to understanding mechanisms of carrier formation. Here, we use an established reconstitution system  
18 to visualise the complete, membrane-assembled COPII coat with unprecedented detail by cryo-electron  
19 tomography and subtomogram averaging. We discover a network of interactions within and between  
20 coat layers, including multiple interfaces that were previously unknown. We reveal the physiological  
21 importance of these interactions using genetic and biochemical approaches. A newly resolved Sec31 C-  
22 terminal domain provides order to the coat and is essential to drive membrane curvature in cells.  
23 Moreover, a novel outer coat assembly mode provides a basis for coat adaptability to varying  
24 membrane curvatures. Furthermore, a newly resolved region of Sec23, which we term the L-loop,  
25 imparts coat stability and in part dictates membrane shape. Our results suggest these interactions  
26 collectively contribute to coat organisation and membrane curvature, providing a structural framework  
27 to understand regulatory mechanisms of COPII trafficking and secretion.

## 28 Introduction

29 Eukaryotic cells are organized in membrane-bound compartments, and a tightly regulated trafficking  
30 system ensures proteins and lipids are delivered to the right place at the right time. Cytosolic coat  
31 proteins capture secretory cargo and sculpt membrane carriers for intracellular transport (Bonifacino  
32 and Glick, 2004). A third of all proteins in eukaryotic cells are synthesized in the Endoplasmic Reticulum  
33 (ER) and trafficked to the Golgi, destined for secretion or residency within organelles (Ghaemmaghami  
34 et al., 2003). ER export is mediated by the coat protein complex II (COPII), which minimally comprises  
35 five cytosolic proteins that form two concentric layers on the ER membrane – the inner and outer coat  
36 (Zanetti et al., 2012). The inner coat layer consists of the small GTPase Sar1 and the heterodimeric  
37 Sec23/24 complex, whilst the outer coat layer comprises the rod-shaped heterotetramer Sec13/31.  
38 COPII dynamically assembles and disassembles at ER exit sites, imparting enough force to bend the  
39 membrane into unfavourable conformations while at the same time maintaining a range of membrane  
40 curvatures. It remains unclear how the COPII coat achieves the required balance of strength and  
41 flexibility, and how this balance is regulated to form vesicles of different sizes and shapes, essential to  
42 transport a diverse range of cargo molecules (Hutchings and Zanetti, 2019).

43 COPII assembly begins with the formation of the inner coat, after GTP-bound Sar1 exposes an  
44 amphipathic helix for burial into the ER membrane (Hutchings et al., 2018; Lee et al., 2005). Sar1-GTP  
45 then recruits Sec23/24. Sec23 binds Sar1 and is the dedicated GTPase-activating protein (GAP)

46 (Antonny et al., 2001; Barlowe et al., 1994; Bi et al., 2002), whilst Sec24 possesses multiple binding sites  
47 for cargo recruitment (Miller et al., 2003; Mossessova et al., 2003). Sec23 also recruits the outer coat  
48 subunits Sec13/31 through a flexible proline-rich domain (PRD) in the C-terminal half of Sec31, which  
49 accelerates the GAP activity of Sec23 (Bi et al., 2007). Both the inner and the outer coat are thought to  
50 oligomerise and induce membrane curvature to form coated membrane carriers (Hutchings et al.,  
51 2018; Stagg et al., 2008, 2006; Zanetti et al., 2013). COPII has been shown to generate vesicles and  
52 tubules both *in vivo* and *in vitro*, suggesting the coat is adaptable for different morphologies (Bacia et  
53 al., 2011; Barlowe et al., 1994; Fromme et al., 2007; Gorur et al., 2017; K. Matsuoka et al., 1998; Venditti  
54 et al., 2012; Zanetti et al., 2013). This is consistent with a need to maintain constitutive secretion of  
55 soluble proteins, whilst also accommodating much larger cargo such as procollagens and pre-  
56 chylomicrons in specialised mammalian cells (Gorur et al., 2017; Hutchings and Zanetti, 2019; Jin et al.,  
57 2012; Malhotra and Erlmann, 2015; Townley et al., 2008).

58 COPII assembly is governed by numerous interactions within and between the coat layers (Bi et al.,  
59 2007; Hutchings et al., 2018; Ma and Goldberg, 2016; Stagg et al., 2008; Stancheva et al., 2020). Lateral  
60 interactions between inner coat subunits mediate its polymerisation into arrays, which have been  
61 proposed to prime coat assembly and directly orient membrane curvature through Sar1 amphipathic  
62 helix insertion (Hutchings et al., 2018). The outer coat proteins Sec13/31 also self-associate, assembling  
63 into cages of different geometries *in vitro*, including polyhedral and tubular arrangements of varying  
64 diameters (Stagg et al., 2008, 2006; Zanetti et al., 2013). The assembly units of the cage comprise two  
65 structured domains in the N-terminal half of Sec31: an N-terminal  $\beta$ -propeller and an  $\alpha$ -solenoid  
66 domain. These domains are separated by a blade insertion motif, which binds the Sec13  $\beta$ -propeller  
67 and rigidifies the assembly (Čopič et al., 2012; Fath et al., 2007). The Sec31  $\alpha$ -solenoid domain drives  
68 homodimerisation of Sec31 to create a rod-shaped tetrameric assembly element, whilst the N-terminal  
69  $\beta$ -propeller domain mediates contacts between four rods to generate a cage (Fath et al., 2007). Sec31  
70 also contains a putative helical C-terminal domain (CTD), that is separated from the cage-forming  
71 elements by a long flexible proline-rich domain (PRD) (Fath et al., 2007). No role for the CTD has yet  
72 been assigned, but limited proteolysis experiments and secondary structure prediction suggest an  
73 ordered helical domain of  $\sim 18$  kDa (Dokudovskaya et al., 2006; Paraan et al., 2018).

74 Interactions between inner and outer coat layers are mediated by the Sec31 PRD, which binds Sec23 at  
75 several interfaces, including: i) a GAP-accelerating region that binds the Sar1-Sec23 interface (Bi et al.,  
76 2007), ii) triple-proline (PPP) motifs binding the tip of the Sec23 gelsolin domain that assist in the  
77 assembly of inner coat subunits (Hutchings et al., 2018; Ma and Goldberg, 2016), and iii) a recently  
78 defined but structurally uncharacterized charge-based interaction (Stancheva et al., 2020). Several  
79 COPII ancillary proteins also possess PRDs that bind Sec23 in a similar way to Sec31, possibly stabilising  
80 the coat for formation of larger carriers during procollagen transport in mammals (Hutchings and  
81 Zanetti, 2019; Ma and Goldberg, 2016; Saito et al., 2009; Santos et al., 2016). Some of the interaction  
82 interfaces, including outer-inner coat interactions mediated by PPP motifs and the Sec31 active  
83 peptide, as well as cage vertices, have been characterized structurally. Disruption of many of these  
84 interfaces are tolerated individually but not in combination, implying a network of partially redundant  
85 interactions that collectively stabilise coat assembly (Hutchings et al., 2018; Stancheva et al., 2020). For  
86 instance, partial disruption of outer coat polymerisation by means of an N-terminal His-tag on Sec31  
87 (NHis-Sec31) still permits viability in yeast, but not in combination with other mutations targeting PRD  
88 interactions (Stancheva et al., 2020).

89 The full extent and role of coat interactions is not clear, and several questions remain unanswered.  
90 How does the interplay between inner and outer coat layers influence membrane curvature and  
91 budding morphology? Which coat interactions have a regulatory role? Which interactions are  
92 important to provide membrane bending force, and which confer flexibility to the coat? Here, we build  
93 on a previously established approach (Hutchings et al., 2018; Zanetti et al., 2013) using cryo-electron  
94 tomography (cryo-ET) and subtomogram averaging (STA) of *in vitro* reconstituted COPII coated tubules  
95 to obtain the complete, detailed picture of a fully assembled wild-type coat. In addition to structurally

96 characterising known interactions to unprecedented detail, we describe novel ones that link both coat  
97 layers into an intricate network.

98 At the level of the outer coat, we describe a vertex interface that is significantly different from previous  
99 reports, we discover an essential role for the structurally and functionally elusive Sec31 CTD as a key  
100 node of the COPII network, and an unexpected interaction between Sec31  $\beta$ -propeller and  $\alpha$ -solenoid  
101 domains that seems to confer the ability to adapt to membrane with varying curvatures. We map three  
102 different interactions between the inner and outer coat layers, including a structurally uncharacterised  
103 charged interaction that was recently identified through biochemical and genetic analysis (Stancheva  
104 et al., 2020). Finally, at the inner coat assembly interface we resolve a novel flexible loop on Sec23 that  
105 becomes ordered to contribute to lattice formation. We include biochemical and genetic analyses that  
106 shed light on the role of many of known and novel interactions, providing evidence for a complex and  
107 flexible network that serves as a basis for dynamic regulation of membrane remodelling.

## 108 Results

### 109 *Detailed architecture of outer coat vertices suggests conditional requirement for vertex formation*

110 Incubating purified COPII components with GUVs and non-hydrolysable GTP (GMP-PNP) induces  
111 extensive tubulation of membranes (Bacia et al., 2011; Zanetti et al., 2013). We optimised our  
112 previously established *in vitro* reconstitution and structural analysis pipeline (Hutchings et al., 2018;  
113 Zanetti et al., 2013) to obtain high-resolution cryo-EM data of COPII induced tubules. We collected tilt  
114 series of reconstituted budding reactions, which were subsequently used to reconstruct 3D tomograms  
115 of the tubules (Fig 1 A and Supplementary Fig 1A), and we then used subtomogram averaging to obtain  
116 the structures, positions and orientations of inner and outer coat subunits (Methods and  
117 Supplementary Fig 1B,D).

118 The outer coat forms a sparse rhomboidal lattice in which four Sec31 N-terminal  $\beta$ -propeller domains  
119 interact to form 2-fold symmetric X-shaped vertices (Fig. 1B,C). The vertex was refined to a resolution  
120 of approximately 12 Å (Supplementary Fig. 2A). We could clearly distinguish the  $\beta$ -propeller shapes and  
121 unambiguously rigid-body fit the available Sec13/31 crystal structures (Fig. 1C). The Sec13  $\beta$ -propeller  
122 is also clearly defined, although features gradually degrade along rods further from the vertex, probably  
123 due to a higher degree of flexibility. Close analysis of the vertex  $\beta$ -propeller interfaces identified a region  
124 of density that likely corresponds to a negatively charged loop (residues 339-357:  
125 EQETETKQQESETDFWNNV) that is disordered in the crystal structure (Fath et al., 2007). It appears that  
126 this loop becomes ordered in the assembled vertex and forms an interaction interface with the  
127 neighbouring subunits (Supplementary Fig. 3A). We previously discovered that Sec31 with a his-tag at  
128 its N-terminus (Nhis-Sec31) yielded tubes with a disordered outer coat, due to destabilization of vertex  
129 formation (Hutchings et al., 2018). The proximity of the 339-357 loop to the N-terminus of Sec31 might  
130 explain the vertex disruption we observed with Nhis- Sec31 (Hutchings et al., 2018), as the tag might  
131 displace or interfere with this interaction surface.

132 With this new insight into how Nhis-Sec31 might perturb cage assembly, we sought to further probe  
133 the importance of vertex interactions by disrupting the system even further and deleting the Sec31 N-  
134 terminal  $\beta$ -propeller domain (residues 1-372, Sec31- $\Delta$ NTD, Figure 1D, top panel). Abrogating outer coat  
135 vertex interactions completely did not support vesicle formation from microsomes, even with the coat  
136 stabilised by non-hydrolysable GTP analogs, a condition that was permissive for Nhis-Sec31 (Hutchings  
137 et al., 2018)(Supplementary Fig. 3B). Sec31- $\Delta$ NTD was efficiently recruited to membranes  
138 (Supplementary Fig. 3C), and, surprisingly, was capable of tubulating GUVs, suggesting its ability to  
139 organize the inner coat array was intact, and that inner coat organization is sufficient to drive  
140 membrane curvature in a synthetic model membrane (Supplementary Fig. 3D). Sec31- $\Delta$ NTD was lethal  
141 when expressed as the sole copy of Sec31 in wild-type yeast (Fig. 1D, middle panel), but was viable in  
142 an *emp24 $\Delta$*  strain (Fig 1D, bottom panel). Deletion of Emp24 is thought to lower the membrane bending  
143 energy during vesicle formation by depleting abundant lumenally-oriented cargo. This condition has

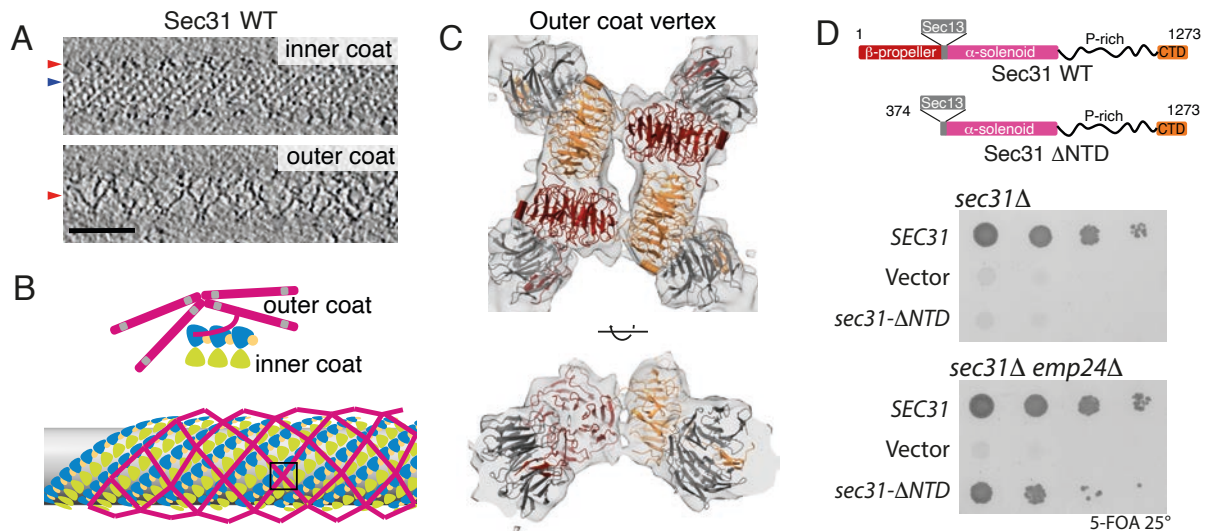

Figure1. Architecture of outer COPII coat vertices

A. Slices through different z heights of a binned and filtered representative cryo-tomogram of wild type COPII-coated tubule. Inner and outer coats (blue and red arrowheads respectively) are visible. Scale bar 50 nm.

B. Schematic representation of outer coat architecture. Sec13-31 subunits arrange in a lozenge pattern, around the inner coat that arranges in a tightly packed lattice. Panels C-E focus on the structure of vertices, boxed in this schematics.

C. Top and side views of the 12 Å subtomogram average of the COPII vertex, with rigid-body fitted atomic models (PDB 2PM6 and 2PM9). Sec31 protomers in dark red and orange, Sec13 in gray.

D. Top panel: Domain organisation of wild type Sec31, and the ΔNTD mutant. Middle panel: a *sec31Δ* yeast strain transformed with the indicated plasmids was tested on 5-FOA, revealing lethality associated with deletion of the NTD. Bottom panel: the same experiment repeated with a *sec31Δ emp24Δ* yeast strain reveals that depletion of *emp24* rescues the lethality associated with deletion of the Sec31 NTD.

144 been shown previously to confer tolerance to the otherwise lethal absence of Sec13 (Čopič et al., 2012).  
 145 Together, the *in vitro* and *in vivo* phenotypes reveal that outer coat vertex interactions are not needed  
 146 to generate curvature on easily deformable membranes. This suggests that a main driving force for  
 147 budding is inner coat lattice formation, and that the stable association of vertex interfaces, as well as  
 148 inner coat stability tuned by GTPase activity, are needed for remodelling of cargo-containing  
 149 membranes that resist budding.

#### 150 Comparison with previously obtained vertex structures

151 The arrangement of the Sec31 N-terminal β-propellers in our structure differs significantly from  
 152 previously published cryo-EM single particle reconstructions obtained from human Sec13-31 cages  
 153 assembled in the absence of a membrane (Noble et al., 2013; Stagg et al., 2008, 2006) (Supplementary  
 154 Fig. 3E). Indeed, when comparing the soluble cage vertex with that obtained in this study by overlapping  
 155 one of the Sec31 β-propeller subunits, we find that the relative position of both neighbours is shifted  
 156 by more than 15Å (Supplementary Fig. 3F). In the soluble cages, a pair of opposite β-propellers in the  
 157 vertex forms a tight interaction (identifying the '+' contacts (Stagg et al., 2006)), while the other pair is  
 158 further apart, separated by the '+' rods (and referred to as the '-' interaction). In the context of the  
 159 membrane-assembled coat, we see a clear gap between both the '+' and '-' pairs of β-propellers  
 160 (Supplementary Fig. 3E). Multiple effects might cause this difference: 1. Interactions of vertices  
 161 arranged in a tubular geometry may be different from those on spherical vesicles; 2. Interactions in  
 162 soluble cages may be distinct from those in the membrane-assembled coat; and 3. Proteins from  
 163 different species may have evolved different interaction interfaces, while maintaining an overall similar  
 164 assembly architecture. We tested the first two hypotheses by examining the small populations of  
 165 spherical vesicles and empty cages that were present in our tomograms. We manually picked vertices

166 and performed alignments against two different references: one derived from the soluble cage vertex  
167 and one from our vertex structure on membrane tubules. For both datasets, alignments converged to  
168 virtually identical structures, with an interface similar to that on membrane-assembled tubules, with a  
169 clear gap at the centre of the vertex (Supplementary Fig. 4). While we cannot exclude that the  
170 difference we see between empty cages in our sample and those previously published might be caused  
171 by buffer conditions, we hypothesise that vertex interactions are different in yeast and human.

## 172 *Detailed structure of interconnecting rods*

173 Outer coat vertices are connected by Sec13-31 rods that wrap tubules both in a left- and right-handed  
174 manner, which we refer to as left- and right-handed rods (Zanetti et al., 2013). As mentioned above,  
175 when refining by alignment of vertices, the density further from the centre gradually degrades, due to  
176 increased flexibility or heterogeneity. We therefore analysed the structure of the interconnecting rods  
177 by focusing the refinements at the mid-points between vertices (see Methods). Left-handed rods (Fig.  
178 2A) averaged to a resolution of  $\sim 11$  Å (Supplementary Fig. 2A), and we could fit the available crystal  
179 structures of dimeric edge elements (Fath et al., 2007) by treating each monomer as a rigid body (Fig.  
180 2B,C). At this resolution we can distinguish helical profiles and individual blades of the Sec13  $\beta$ -propeller  
181 (Fig. 2C). As previously reported, rods in membrane-coated tubules are only slightly bent, resembling  
182 the X-ray structure (Fath et al., 2007) rather than the highly bent edges of soluble assembled cages (Fig.  
183 2B, bottom panel, (Stagg et al., 2006)). Surprisingly, we detected a previously unresolved extra density  
184 attached to the rod halfway between Sec13 and the dimerization interface (Fig. 2B,D). The size of this  
185 appendage is indicative of a full domain. This extra density is probably sub-stoichiometric, as we could  
186 see it clearly only at low contour levels (Fig. 2B,D) or in averages with lower sharpening levels (not  
187 shown). We reasoned that it could correspond to the Sec31 CTD, which is predicted to be a structured  
188 helical domain (Dokudovskaya et al., 2006; Fath et al., 2007).

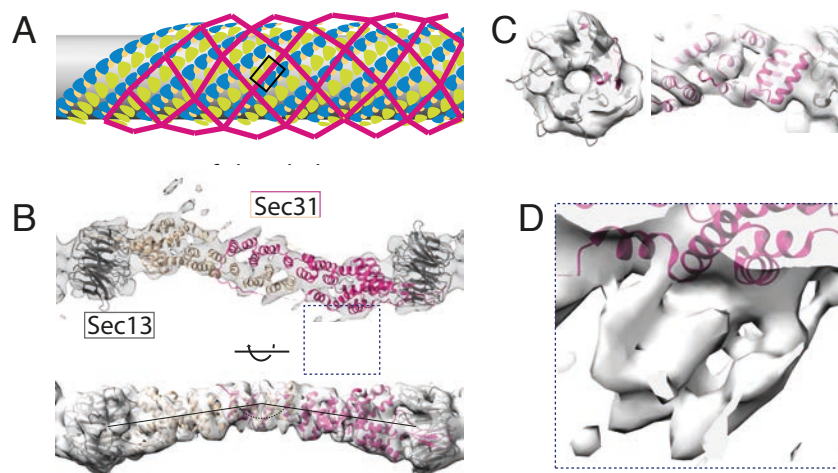

Figure 2. Architecture of COPII rods organised in a left-handed manner

A. Schematic representation of outer coat lozenge architecture, with left-handed rod positions highlighted in the box.

B. Top panel: top view of the 11 Å subtomogram average of the COPII left-handed rod, with rigid-body fitted atomic models (PDB 2PM6). The dimerising protomers are shown in dark and light pink, Sec13 in grey. Bottom panel: sideview of B.

C. Details of the map in B, showing the quality of the fit. Left panel: detail of Sec13  $\beta$ -propeller. Right panel: detail of Sec31  $\alpha$ -solenoid domain.

D. Enlargement of the region boxed in panel B shown at lower contour to display an extra density.

190 *Sec31 C-terminal domain mediates essential coat interactions*

191 To confirm that the appendage density corresponds to the CTD of Sec31, we analysed GUVs budded  
 192 with a truncated form of Sec31 (encompassing residues 1 to 1114, referred to as Sec31- $\Delta$ CTD, Fig. 3A).  
 193 In cryo-tomograms of these tubules the outer coat was generally less ordered with respect to the wild  
 194 type, whilst the inner coat maintained a typical pseudo-helical lattice (Fig. 3B). To conduct an unbiased  
 195 search for rods, we used a featureless rod-like structure as a template, and subsequently aligned the  
 196 detected particles to the subtomogram average obtained from the wild type sample. The average of  
 197 Sec31- $\Delta$ CTD rods recovers the characteristic features and has similar resolution to the wild type rod,  
 198 but it lacks the appendage density (Fig. 3C, orange arrowhead), confirming this density most likely  
 199 corresponds to the CTD. The Sec31- $\Delta$ CTD rod also showed weaker density for vertices and the inner  
 200 coat and membrane layer (Fig. 3C, red, blue and beige arrowheads, respectively), indicative of its less  
 201 ordered arrangement.

202 Since no atomic model for Sec31 CTD has been determined, we built a homology model to fit into the  
 203 appendage density. Steroid Receptor RNA Activator protein (SRA1) is the closest homologue to Sec31  
 204 CTD for which an atomic structure exists (Bilinovich et al., 2014). SRA1 is a functionally unrelated protein  
 205 that is found only in mammals, and its evolutionary links with Sec31 are unclear. Nevertheless, SRA1

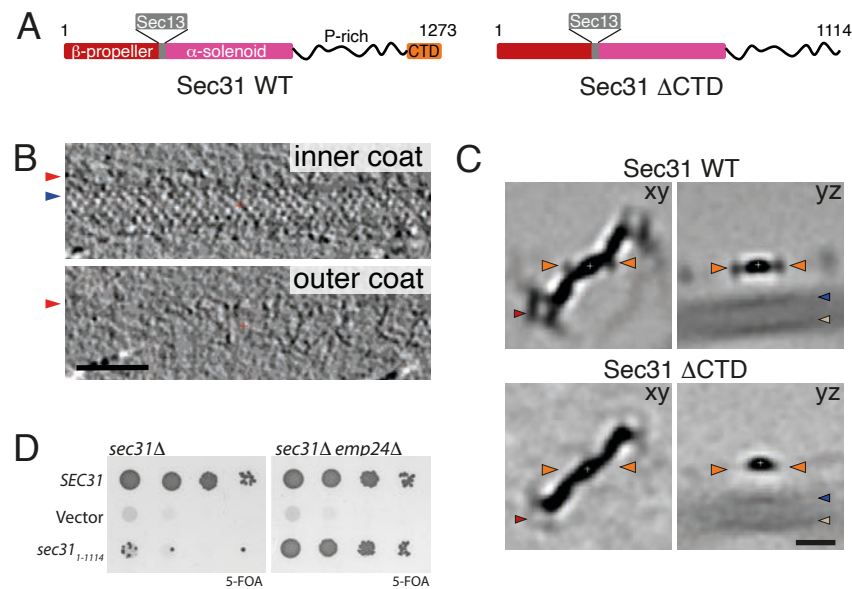

Figure 3. Role of the Sec31 CTD

A. Domain organisation of wild type Sec31, and the  $\Delta$ CTD mutant.

B. Slices through different z heights of a binned and filtered representative cryo-tomogram of COPII-coated tubule formed with Sec31- $\Delta$ CTD. Arrowheads as in Fig. 1A. The outer coat appears partially disordered. Scale bar 50 nm.

C. Top panels: slices through xy and yz planes of 8X binned subtomogram average of rods extracted from wild type tubules. Orange arrowheads indicate the appendage density in Fig 2D. Red arrowhead indicates the vertex, and beige is the membrane. Bottom panels. The same slices for the average of rods extracted from tubules formed with Sec31- $\Delta$ CTD. Extra density is absent, confirming its assignment to Sec31 CTD. The density for the vertex and membrane is also fainter, indicating overall disorder of rods in this sample. Scale bar 10 nm.

D. Left panel: a *sec31* $\Delta$  yeast strain transformed with the indicated plasmids was tested on 5-FOA, revealing lethality associated with deletion of the CTD. Right panel: the same plasmids were transformed into a *sec31* $\Delta$  *emp24* $\Delta$  yeast strain revealing rescue of viability.

206 and Sec31 CTD belong to the same evolutionary family and their similarity justifies the use of the SRA1  
207 structure to build a homology model of the Sec31 CTD (see Methods). Rigid-body fitting the homology  
208 model in the appendage density shows consistency of features, and provides insights into the binding  
209 orientation of the CTD, although at this resolution we cannot determine the precise molecular interface  
210 (Supplementary Fig. 5A-C).

211 In order to assess the physiological importance of the Sec31 CTD in the secretory pathway, we made  
212 yeast mutants where Sec31 was substituted with Sec31- $\Delta$ CTD. When the truncated form was the sole  
213 copy of Sec31 in yeast, cells were not viable, indicating that the novel interaction we detect is essential  
214 for COPII coat function (Fig. 3D, left panel). In contrast, when the cargo burden was decreased by  
215 deletion of the ER export receptor, Emp24, Sec31- $\Delta$ CTD supported viability (Fig. 3D, right panel). This  
216 phenotype is similar to the depletion of the Sec31- $\Delta$ NTD or of Sec13 (Čopič et al., 2012), and leads us  
217 to hypothesise that Sec31 CTD binding to Sec31 rods stabilises the COPII interaction network, thereby  
218 imparting rigidity and strengthening the coat. Microsome budding reconstitution experiments using  
219 Sec31- $\Delta$ CTD give further insight into this functional defect. The mutant protein is capable of forming  
220 vesicles in the presence of a non-hydrolysable GTP analogue, albeit with reduced efficiency compared  
221 to wild type. However, when GTP is used, vesicles fail to form despite Sec31- $\Delta$ CTD being efficiently  
222 recruited to membranes (Supplementary Fig. 5D, E). This indicates that CTD-mediated outer coat  
223 stabilisation becomes necessary when inner coat turnover is allowed, reminiscent of the phenotype  
224 seen with Nhis-Sec31 and further supporting a role in outer coat organisation (Hutchings et al., 2018).  
225 We next asked whether stabilisation of both the N and C-terminal interactions was dispensable in  
226 conditions of efficient inner coat polymerisation, by performing GUV budding reconstitutions in the  
227 presence of Nhis-Sec31- $\Delta$ CTD. While both Sec31- $\Delta$ CTD and Nhis-Sec31 showed tubulation, we could  
228 not detect any tubules in negatively stained grids of the combined mutant (data not shown). This  
229 suggests that, even when membranes are easily deformable and inner coat assembly is stabilised by  
230 the absence of GTP hydrolysis, some level of outer coat organisation is required to deform membranes,  
231 and the inner coat bridging activity of the Sec31 triple proline motifs is not sufficient.

### 232 *Interactions between $\beta$ -propeller and $\alpha$ -solenoid domains define extra rod connections.*

233 We next analysed rods that interconnect vertices in the right-handed direction (Fig. 4A). Surprisingly,  
234 in addition to the CTD appendages, a second region of ill-defined extra density was present near the  
235 Sec31 dimerization region (Supplementary Fig. 6A). Upon classification we could divide the right-  
236 handed rod dataset into two classes, both of which converged to resolutions between 13 Å and 15 Å  
237 (Fig. 4B and Supplementary Fig. 3A). The first class is analogous to the left-handed rods, whereas the  
238 second class has a density attached to the centre of the rod which clearly resembles a pair of  $\beta$ -propeller  
239 subunits, suggesting the presence of an unexpected additional Sec13-31 edge attached to the Sec31  $\alpha$ -  
240 solenoid. We confirmed the nature of the extra density by focussing refinements on the predicted  
241 centre of the 'extra' rod, obtaining the unambiguous shape of a Sec13-31 heterotetramer  
242 (Supplementary Fig. 6B), which runs nearly perpendicular to, and bridges between, two right-handed  
243 rods. Analysis of the averages placed in the context of individual tomograms shows that the extra rods  
244 are sparsely and randomly distributed (Fig. 4C). We also note that they follow a similar direction to the  
245 left-handed rods, running along the direction of the main Sec23-Sec23 inner coat interfaces (Fig. 4D).

246 Since the extra rods bridge between  $\alpha$ -solenoid dimerization interfaces of right-handed rods, we expect  
247 that the distribution of neighbouring vertices compared to the centres of the extra rods should form a  
248 rhombus (dotted lines in Supplementary Fig. 6C). However, when we plotted the position of vertices  
249 neighbouring the extra rods, we noticed that in addition to the expected peaks, there was a cluster of  
250 vertices positioned at the tip of the extra rods (Supplementary Fig. 6C, red circle). This suggested that  
251 a subpopulation of these extra rods could connect to a right-handed rod on one side and form a  
252 standard vertex on the other. By selecting these rods and calculating their average, we confirmed the  
253 presence of the two different connections (Supplementary Fig. 6D). The localisation of these hybrid  
254 rods in the tomogram shows that these are often placed at the interface between two patches of outer

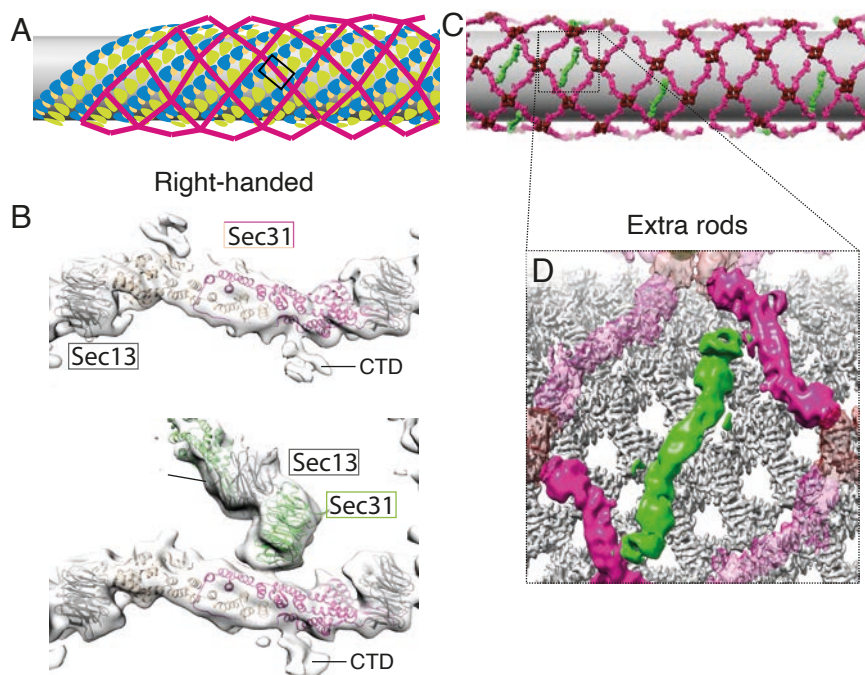

Figure 4. Architecture of COPII rods organised in a right-handed manner

A. Schematic representation of coat architecture, with right-handed rod positions highlighted in the box.

B. Top panel: top view of the 13 Å subtomogram average of the COPII right-handed rod with no extra density at the dimerization interface, with rigid-body fitted atomic models (PDB 2PM9). The dimerising protomers are shown in dark and light pink, Sec13 in grey. The CTD is visible in these rods. Bottom panel: the same view of a class of right-handed rods that displays an attachment of another rod. The Sec13-31 beta propeller tandem is fitted (Sec31 in green and Sec13 in grey).

C. Averages of vertices (dark red), left and right-handed rods (pink) are placed in their aligned positions and orientations in a representative tomogram. Extra rods are placed in green, and display random distribution, but unique orientation.

D. Enlargement of the placed object, with the placed inner coat (grey), showing that extra rods orient roughly parallel to the inner coat lattice direction.

255 coat lattice that come together with a mismatch (Supplementary Fig. 6E). This indicates that the novel  
256 mode of interaction we characterise here might help the outer coat network adapt to different  
257 curvatures.

#### 258 *Extended interactions between the inner coat and the Sec31 disordered region.*

259 Compared to previous work (Hutchings et al., 2018), the ordered outer coat now allows to gain new  
260 insights into inter-layer interactions. We therefore refined the structure of the inner coat from fully  
261 ordered coated tubules to an average resolution of 4.6Å (Supplementary Fig. 2B). Density modification  
262 (Terwilliger et al., 2020) and sharpening further improved features in the map (Supplementary Fig. 7A),  
263 permitting to unambiguously fit of X-ray models of Sec23, Sec24 and Sar1. The resolution and overall  
264 quality of our map allowed us to build regions that were missing from the X-ray structures and refine  
265 the model (Supplementary Fig. 7B,C). We analysed the sites of interaction with the outer coat by  
266 identifying regions in the map that are not explained by the model (prominent regions in their  
267 difference map, Fig. 5A,B). These are generally better defined than in our previous map obtained with  
268 disordered outer coat (Hutchings et al., 2018), possibly due to more stable interactions and lower  
269 flexibility. We confirmed the binding of the Sec31 active peptide to Sec23 through its WN residues, as  
270 well as that of Sec31 PPP motifs to the Sec23 gelsolin domain. Here we can clearly detect a single  
271 density that extends on both sides of the prolines to contact two adjacent inner coat subunits,



272 supporting previous hypotheses that PPP-containing sequences bridge between neighbouring inner  
273 coat subunits and contribute to the stability of the lattice (Fig. 5B) (Hutchings et al., 2018; Ma and  
274 Goldberg, 2016; Stancheva et al., 2020).

275 In addition to the expected Sec31 binding sites, the difference map showed a prominent region that  
276 we did not see in the context of Nhis-Sec31. We now see density corresponding to a long 'sausage-like'  
277 region nestled in a negatively charged concave surface between the Sec23 Zn-finger, helical, and  
278 gelsolin-like domains (Fig. 5B, C, asterisk). In a recent report, we showed that binding between the  
279 outer and inner layers of the COPII coat is mediated by multivalent interactions of the Sec31 disordered  
280 domain with Sec23 (Stancheva et al., 2020). These interactions involve the previously identified  
281 catalytic and triple proline regions, and a novel charge-based interaction between the positively  
282 charged Sec31 disordered domain and negatively charged surface on Sec23. Charge reversal of the  
283 Sec23 surface led to abolished recruitment of Sec13-31 and a non-functional coat (Stancheva et al.,  
284 2020). We are now able to map this essential interaction and show it spans ~25 Å, corresponding to 9-  
285 10 residues.

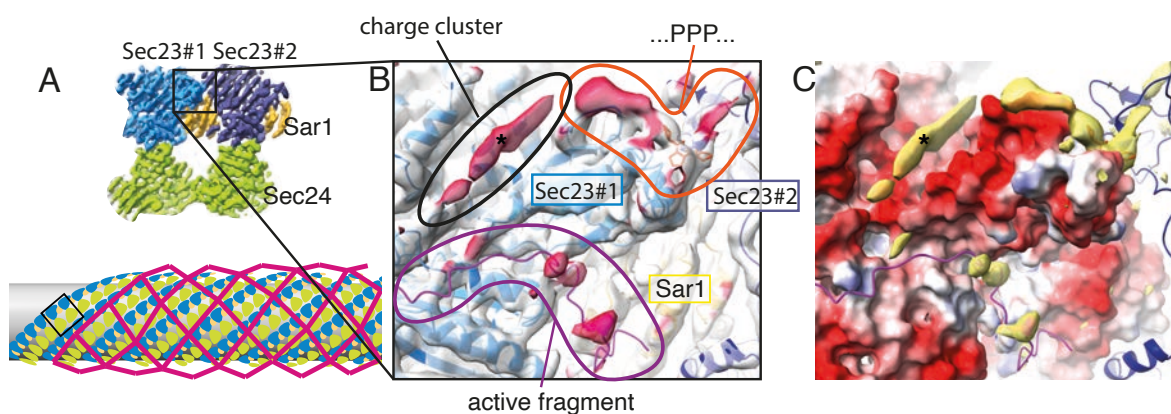

Figure 5. Inner-outer coat interactions

A. Top: the inner coat lattice structure, with a box indicating the region represented in panels B and C. Bottom: schematic representation of coat architecture, with inner coat highlighted in the box.

B. The density-modified inner coat subtomogram average and the refined atomic model. The map is coloured in transparent white, while regions that are further than 3 Å from the model are coloured in dark red, indicating density that is not explained by the model and is attributed to outer coat binding.

C. The difference map between the map and a model-generated density (filtered at 4 Å, yellow) is overlaid to the model surface coloured according to its Coulombic potential. The outer coat density indicated by the asterisk binds to a negatively charged groove on Sec23.

## 286 *Sec23-Sar1 interactions in lattice formation*

287 Inner coat subunits assemble through a lattice interface between Sar1 and Sec23 from one protomer,  
288 and Sec23 from the neighbouring protomer (Fig. 6A). Analysis with the PDBePISA web server (Krissinel  
289 and Henrick, 2007), indicates this interface extends over a large surface of 910 Å<sup>2</sup>, with individual  
290 contacts expected to only partially contribute to its stability. The PPP-mediated contacts between one  
291 Sec23 gelsolin-like domain and the neighbour Sec23 Zn-finger domain are part of this extended  
292 interface. As part of the extended lattice interface, Sar1 contacts the neighbouring Sec23 trunk domain.  
293 We detect a prominent contribution mediated by a 17-residue loop of Sec23 (residues 201-217,  
294 KPTGPGGAASHLPNAMN, which we name L-loop, for lattice) that is not visible in the X-ray structures.  
295 Secondary structure predictions denote this region as disordered and highly prone to protein binding

296 (Supplementary Fig. 7D). In our structure we can clearly visualise and model the L-loop in Sec23, which  
297 becomes partially ordered in its interaction with Sar1 (Fig. 6B). To assess the importance of the L-loop  
298 interaction in lattice formation and membrane tubulation, we mutated the 17 residues to a stretch of  
299 5 glycine-serine repeats and tested this mutant in GUV budding reactions. The Sec23 L-loop mutant did  
300 not lead to any significant phenotype, with straight tubes forming (Fig. 6C). This is not unexpected, due  
301 to the loop's marginal contribution to the inner coat lattice interface. Indeed, weakening the lattice  
302 interface by mutating PPP motifs on Sec31 (Sec31- $\Delta$ PPP) does not change tube morphology either  
303 (Stancheva et al., 2020). However, when we aggravated the disruption by combining the Sec23 L-loop  
304 and Sec31- $\Delta$ PPP mutants, budding reactions showed a striking absence of straight tubules, and  
305 enrichment of multibudded profiles (Fig. 6D). This indicated that when inner coat interactions are  
306 significantly weakened, the outer coat becomes the main determinant of membrane remodelling and  
307 defaults to inducing spherical curvature. Indeed, when we also weakened outer coat vertex interactions

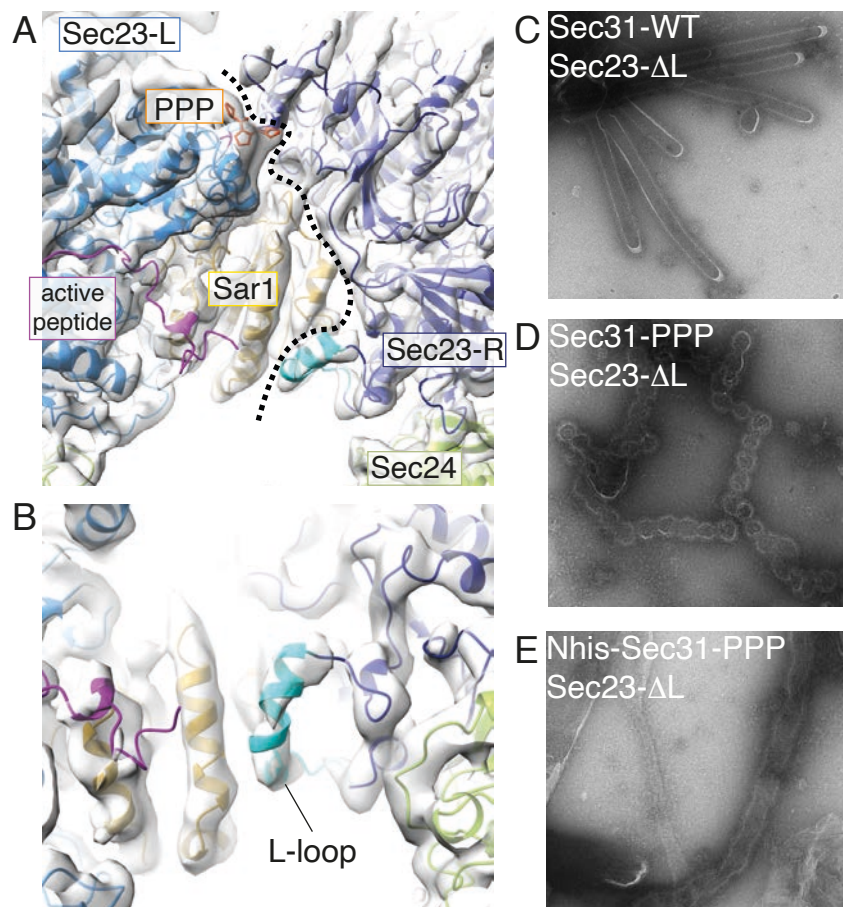

Figure 6. Interface between inner coat subunits

A. The interface between neighbouring inner coat subunits viewed from the top. A dotted line defines the boundary between two protomers.

B. Enlarged view of the Sec23-Sar1 interface, with the modelled Sec23 17-residue L-loop in dark cyan. This loop is disordered in the X-ray structure, but becomes ordered in the lattice, mediating interactions with Sar1.

C. GUV budding reconstitutions in the presence of wild type Sec31 and Sec23 lacking the L-loop show straight tubules, similar to wild type reactions.

D. Budding creates spherical profiles when Sec31 has all of its PPP sites mutated to alanine to further weaken inner coat assembly.

E. Floppy tubules form when, in addition to the conditions in D, Sec31 vertex interactions are destabilised with Nhis-Sec31. Scale bar 100 nm.

308 by using an N-terminal his-tagged version of Sec31- $\Delta$ PPP, budding gave rise to ‘floppy’ tubules rather  
309 than multibudded profiles (Fig. 6E).

## 310 Discussion

311 We have combined cryo-tomography with biochemical and genetic assays to obtain a complete picture  
312 of the assembled COPII coat at unprecedented resolution. We make a number of novel observations  
313 which allow us to piece together a picture of the COPII coat as a complex network of partially redundant  
314 interactions (Fig. 7). Structural and functional analysis of each interface reveals their role in coat  
315 assembly and membrane remodelling, shedding new light on the COPII-mediated membrane budding  
316 mechanism.

317 We map outer coat vertex interactions in detail, and dissect their role in membrane remodelling. Using  
318 an N-terminal deletion mutant of Sec31 in a range of assays that sample various degrees of membrane  
319 deformability, we show that outer coat assembly into cages is necessary *in vivo* to overcome membrane  
320 resistance to deformation, but is dispensable in conditions where membranes are more easily  
321 deformed thanks to the absence of certain cargo (Fig. 1 and Supplementary Fig. 3). Together with the  
322 previous report that outer coat cage stability is dispensable *in vitro* when inner coat turnover is inhibited  
323 (Hutchings et al., 2018), our results challenge the widely accepted role of the outer coat as a main driver  
324 of membrane curvature.

325 The interactions we observe between four Sec31  $\beta$ -propeller subunits at the vertices of the outer coat  
326 lattice (Supplementary Fig. 3) are distinct from the analogous vertices seen in human Sec31 cages  
327 assembled *in vitro* in the absence of a membrane and Sar1 (Stagg et al., 2008, 2006). The vertex  
328 structure we report here for yeast proteins is much less compact, with deviations of over 15Å in the  
329 relative positions of neighbouring  $\beta$ -propellers. We saw this arrangement on spherical vesicles as well  
330 as empty cages, leading us to hypothesise that the vertex is more compact in humans than in yeast. It  
331 will be interesting to assess whether organisms with more complex secretory needs have selected  
332 tighter and more stable interactions at vertices.

333 Thorough structural analysis of the Sec13/31 rods reveals novel interactions between outer coat units.  
334 The elusive CTD of Sec31 forms a helical bundle, and its function was unknown to date. We show that  
335 Sec31 CTD is as an essential node of the outer coat network that binds to Sec31  $\alpha$ -solenoid domains  
336 (Fig. 2,3 and Supplementary Fig. 5). While we cannot assign a definite function to the Sec31 CTD, the  
337 fact that it is dispensable when membranes are made more deformable by depletion of certain classes  
338 of cargo is reminiscent of the role of Sec13 (Čopič et al., 2012), and of Sec31- $\Delta$ NTD, and suggests that  
339 Sec31 CTD contributes to coat rigidity and/or stability. One possibility is that CTD binding has a role in  
340 restricting the outer coat freedom to move once bound to the inner coat through its flexible disordered  
341 domain, thereby increasing the probability that outer coat lattice can form. Consistent with this, the  
342 outer coat on tubules reconstituted with Sec31- $\Delta$ CTD appears less ordered than in wild type conditions.  
343 Interestingly, human Sec31 proteins lacking the CTD assemble into cages (Peraan et al., 2018),  
344 indicating that either the vertex is more stable for human proteins, or that the CTD is important in the  
345 context of membrane budding but not for cage formation in high salt conditions. Our data paints a new  
346 picture of the assembled coat, where the outer coat C-terminal disordered region reaches down to  
347 bind and stabilise the inner coat, and then loops back to lock onto the outer coat lattice. Our data does  
348 not distinguish between a scenario in which C-terminal domains interact *in cis* or *trans* with outer coat  
349 rods, but it is interesting to hypothesise that *trans*-interactions might further stabilise the coat network  
350 (Fig. 7). While disruption of outer coat assembly at either Sec31 N-terminus or C-terminus is conducive  
351 to budding in conditions of high membrane deformability (for example budding GUVs), when both  
352 interactions are disrupted by using a Nhis-Sec31- $\Delta$ CTD construct, budding is inhibited, indicating that  
353 some level of outer coat assembly is required for membrane deformation.

354 We also discover a second, novel interaction within the outer coat: in addition to the known interaction  
355 of Sec31  $\beta$ -propellers with each other at vertices, these domains can also bind to the Sec31 dimerisation

356 interface, at the centre of the  $\alpha$ -solenoid region. This leads to extra outer coat rods creating a bridge  
 357 between canonical rods (Fig. 4). Occasionally these extra rods form a canonical vertex interaction at  
 358 one end, and an orthogonal interaction with other rods at the other end. Such rods 'glue' mismatched  
 359 patches of outer coat lattice together: they might therefore be important for outer coat stabilisation in  
 360 a context of flexibility and adaptability (Supplementary Fig. 6). It is interesting that we could only detect  
 361 extra rods running in the left-handed direction, and connecting canonical right-handed rods. This could  
 362 be explained by the scenario in which the Sec31 disordered PRD binds to multiple Sec23 subunits in  
 363 tandem, leading to preferential orientation of the extra rods with respect to the inner coat. Due to  
 364 limited particle numbers, the resolution we obtained does not allow us to precisely define the residues  
 365 involved in the novel interaction between the  $\beta$ -propeller and the  $\alpha$ -solenoid domains of Sec31. Higher  
 366 resolution will be needed to inform mutational analysis and assess the physiological and functional  
 367 relevance of this novel connection.

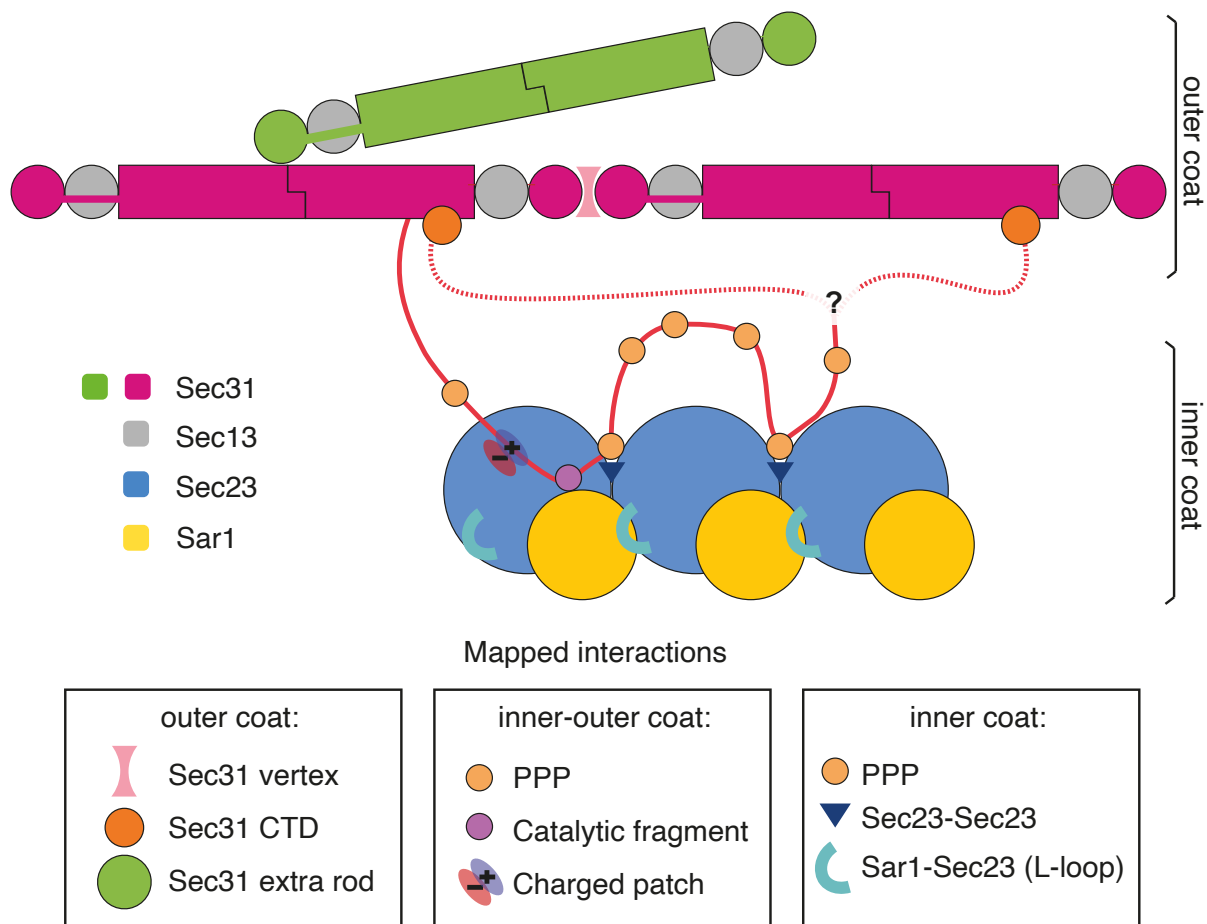

Figure 7. A map of the COPII coat assembly network

A model for how COPII assembles on membranes. Three sets of interactions contribute to coat assembly:

1. Outer-outer coat. Mediated by Sec31  $\beta$ -propellers forming vertices, by Sec31  $\beta$ -propellers binding to the  $\alpha$ -solenoid domain of a different protomer to create 'bridging' rods, and by Sec31 CTD binding to Sec31  $\alpha$ -solenoid domain. It is unclear whether the latter interaction occurs in cis or trans.
2. Outer-inner coat. Mediated by Sec31 disordered region, contributing three interaction sites: triple proline motifs bind to Sec23 bridging between neighbouring subunits; the active peptide binds across Sec23 and Sar1 to accelerate GAP activity, and positively charged clusters bind to a negatively charged groove on Sec23.
3. Inner-inner coat. Mediated by Sec31 PPP motifs (see above), and by an extended lattice interface which includes Sec23-Sec23 interactions as well as Sec23-Sar1 interactions mediated by the L-loop.

368 Interactions between the outer and inner coat are mediated by Sec31 disordered PRD (Bi et al., 2007;  
369 Fath et al., 2007; Ma and Goldberg, 2016; Stancheva et al., 2020). By analysing the structure of the  
370 inner coat we confirm two interactions that have been previously defined and characterised structurally  
371 (Fig. 5): firstly, the Sec31 ‘active peptide’ binds across Sec23 and Sar1, contributing residues in proximity  
372 to the GTP binding pocket, and accelerating Sec23 GAP activity (Bi et al., 2007). Secondly, Sec31  
373 contains triple proline motifs, shared in metazoa by other COPII-interacting factors such as TANGO1  
374 and cTAGE5 (Ma and Goldberg, 2016). These residues bind to the Sec23 gelsolin-like domain and  
375 appear to bridge adjacent inner coat subunits, aiding inner coat lattice formation (Hutchings et al.,  
376 2018; Ma and Goldberg, 2016). In addition, a novel, essential interaction between outer and inner coat  
377 layers was recently discovered. This is mediated by the negatively charged surface of Sec23 that was  
378 postulated to interact with positively charged clusters within the Sec31 PRD (Stancheva et al., 2020).  
379 We detect a prominent density bound to this region of Sec23, located within a groove formed at the  
380 junction between the gelsolin, helical and Zn-finger domains. We attribute this density to the  
381 interacting Sec31 positively charged regions (Fig. 5). Features of this extra density are less well-defined  
382 compared to the rest of the protein. Since multiple charge clusters in yeast Sec31 may contribute to  
383 this interaction interface (Stancheva et al., 2020), the low resolution could be explained by the fact that  
384 the density is an average of different sequences. Although we previously observed densities  
385 corresponding to the PPP and active peptide interactions in our structure assembled with Nhis-Sec31,  
386 the charged interaction was not detected (Hutchings et al., 2018). It is possible that ordering of the  
387 outer coat into a lattice improves the stability and occupancy of this interface.

388 Finally, interactions mediating inner coat assembly into a lattice are defined by our analysis. The first is  
389 the extended interface between Sec23 protomers that involves interaction with a neighbouring  
390 Sec23/Sar1 dimer and is bridged by Sec31 PPP motif (Fig. 6A). The second interface is a novel interaction  
391 between Sec23 and a neighbouring Sar1 molecule, mediated by a 17-residue loop (L-loop) in Sec23  
392 which becomes ordered upon formation of the inner coat lattice (Fig. 6B), and whose importance in  
393 inner coat lattice assembly was confirmed biochemically.

394 Disrupting the inner coat lattice interface in combination with a Sec31 competent for outer coat  
395 assembly leads to budding of vesicles with spherical profiles, rather than a majority of straight tubules  
396 (Fig. 6D), indicating that outer coat assembly into cages dictates spherical membrane shape when the  
397 inner coat is unstable. This might be reflected in a physiological scenario where GTP-hydrolysis triggers  
398 inner coat turnover by removing Sar1 from the membrane, favouring spherical vesicles. Metazoan  
399 proteins such as TANGO1 and cTAGE5, which contain PPP motifs but do not accelerate GTP hydrolysis,  
400 could work by stabilising the inner coat interface while inhibiting GTP hydrolysis, favouring tubules and  
401 promoting transport of large carriers such as procollagen (Ma and Goldberg, 2016). Sec23 is a highly  
402 conserved protein, and is present in two paralogues in metazoa: Sec23A and B. While the two  
403 paralogues are thought to have largely redundant functions, mutations in Sec23A but not B cause  
404 defects in secretion of procollagen (Boydjiev et al., 2006; Fromme et al., 2007). Human Sec23A and B  
405 are 85% identical, and the L-loop sequence is a region that varies significantly (Supplementary Fig. 7E).  
406 Because this region is important in stabilising lattice formation, we hypothesise it is involved in  
407 promoting formation of large carriers: the difference between Sec23A and B in the L-loop might confer  
408 an ability to differentially support large carrier budding, and explain their distinct roles in procollagen  
409 export disease.

410 We know from previous studies that partial disruption of both inner and outer coat layers is  
411 incompatible with life, but can be rescued by relieving the cell of bulky cargoes (Čopič et al., 2012;  
412 Stancheva et al., 2020). Here we show that weakened coat interactions at the level of both inner and  
413 outer coat leads to the formation of floppy tubules (Fig. 6E), suggesting the coat does partially assemble  
414 and impart some membrane deformation, but not sufficient for active cargo transport in cells.  
415 Together, these data suggest that a balance of lattice contacts between the inner and outer coats  
416 support membrane budding, and this balance can be tuned to achieve different morphologies  
417 depending on membrane deformability.

418 In summary, we have shown that COPII forms a complex network that assembles through partially  
419 redundant interactions, whose effects are combined for a productive budding event. We have obtained  
420 a detailed map of this network and have shown that the extent to which the presence and stability of  
421 each interaction are necessary depends on the membrane deformability. This makes the COPII system  
422 an ideal platform for regulation in response to dynamically changing cargo requirements, such as its  
423 abundance, shape and size.

## 424 Materials and methods

### 425 *Cloning:*

426 Yeast COPII components were cloned from the *Saccharomyces cerevisiae* S288c genome into  
427 appropriate expression vectors using In-Fusion (Takara), specifically: pETM-11 (AddGene) for Sar1 and  
428 pFASTBacHTb (AddGene) for Sec23/24 and Sec13/31. N-terminal hexa-histidine purification tags were  
429 cloned with an intervening TEV protease cleavage site for Sar1, Sec24 and Sec31.

### 430 *Protein expression and purification:*

#### 431 Sar1

432 The pETM-11-Sar1 construct was transformed into BL21 using standard heat shock methods. Two litres  
433 of BL21 were induced with 1 mM IPTG for three hours at 25°C before harvesting. Sar1 was affinity  
434 purified following application to a 5 mL HisTrap column (GE Healthcare) equilibrated in lysis/binding  
435 buffer (50 mM Tris-HCl, 150 mM NaCl, 0.1% Tween-20 (v/v), 10 mM imidazole, 1 mM DTT, pH 8.0).  
436 Elution was achieved with a linear gradient of elution buffer (as for binding buffer, with 500 mM  
437 imidazole). Pure fractions were pooled and incubated with TEV protease at a 1:50 ratio of protease: Sar1  
438 (w/w) in a sealed 10 kDa MWCO dialysis tube submerged in two litres of HisTrap binding buffer for  
439 overnight dialysis at 4°C. The dialysed product was reapplied to the HisTrap column with the flow-  
440 through collected and concentrated to ~0.7 mg/mL, determined using a Bradford assay.

#### 441 Sec23/24

442 One litre of Sf9 insect cells (at  $1 \times 10^6$  cells/mL) were infected with baculovirus: 9 mL/L of untagged  
443 Sec23p and 3 mL/L of His-tagged Sec24p. These were incubated for three days at 27°C and 100 rpm  
444 shaking. Cells were harvested using a glass homogeniser and centrifuged at 167,424 g for one hour at  
445 4°C. Sec23/24 was affinity purified following application to a 5 mL HisTrap column (GE Healthcare)  
446 equilibrated in lysis/binding buffer (20 mM HEPES (pH 8.0), 250 mM sorbitol, 500 mM potassium  
447 acetate, 10 mM imidazole, 10% glycerol and 1 mM DTT). Elution was achieved with a linear gradient of  
448 elution buffer (as for binding buffer, with 500 mM imidazole). Pure fractions were collected and diluted  
449 approximately two-fold with low salt anion-exchange binding buffer (20 mM Tris, 1 mM magnesium  
450 acetate, 0.1 mM EGTA, and 1 mM DTT, pH 7.5) before application to an equilibrated 5 mL HiTrap Q  
451 column (GE Healthcare). Elution was achieved with a linear gradient of elution buffer (as for binding  
452 buffer, with 1 M NaCl). Pure fractions were pooled and diluted to ~1.26 mg/mL with low salt buffer and  
453 10% glycerol, which were then aliquoted, flash-frozen and stored at -80°C. The same protocol was  
454 applied for the Sec23 L-loop mutant. For Sec23- $\Delta$ L, residues 201-218 were mutated to 5xGS repeats  
455 using Sec23 pFastBacHTb as the template. The mutation was amplified by PCR and incorporated using  
456 InFusion. The same protein expression and purification protocol as WT Sec23/24 was used.

#### 457 Sec13/31

458 One litre of Sf9 insect cells (at  $1 \times 10^6$  cells/mL) were infected with baculovirus: 9 mL/L of untagged  
459 Sec13p and 3 mL/L of His-tagged Sec31p. To obtain His-tagged Sec13/31 (Sec13/31-NHis), the same  
460 cell lysis and purification protocol (including buffers) was followed as for Sec23/24. Pure fractions from  
461 anion exchange were pooled and concentrated to approximately 2 mg/mL for 50  $\mu$ L aliquots, which  
462 were flash-frozen and stored at -80°C.

463 For cleaved Sec13/31p an additional overnight TEV protease cleavage step was performed for His-tag  
464 removal prior to anion-exchange. Following the initial affinity purification with a 5 mL HisTrap column  
465 (GE Healthcare), the pooled eluate was incubated with TEV protease at a 1:50 ratio of  
466 protease:Sec13/31 (w/w) in a sealed 10 kDa MWCO dialysis tube submerged in two litres of HisTrap  
467 binding buffer for overnight dialysis at 4°C. The dialysed product was reapplied to the HisTrap column,  
468 the flow-through was collected, and then diluted approximately fourfold with low salt buffer for  
469 application to a 5 mL HiTrap Q column. Elution was achieved with a linear gradient of elution buffer  
470 (same as Sec23/24 Q elution buffer). Pure fractions were pooled and concentrated to approximately 2  
471 mg/mL for 50 µL aliquots, which were flash-frozen and stored at -80°C.

472 On the day of GUV BR preparation, Sec13/31 and/or NHis-Sec13/31 aliquots were thawed and gel-  
473 filtrated on a 2.4 mL Superdex200 column (GE Healthcare) mounted on a ÄktaMicro (GE Healthcare)  
474 system, equilibrated in HKM buffer (20 mM HEPES, 50 mM KOAc and 1.2 mM MgCl<sub>2</sub>, pH 6.8). Cleaved  
475 and uncleaved versions of the Sec13/31 mutants used in this study were prepared in the same as the  
476 wild-type protocol detailed above.

477 For the Sec13/31-ΔNTD, a C-terminally His-tagged version of Sec31 truncated at position 373 was used.  
478 This was derived from the Sec31-NHis pFASTBacHTb construct using InFusion cloning. For the Sec13/31-  
479 ΔCTD, a N-terminally His-tagged version of Sec31 covering residues 1-1114 was used. This was derived  
480 from the Sec31-NHis pFASTBacHTb construct using InFusion cloning. For Sec13/31-ΔPPP, a synthetic  
481 DNA construct with seven PPP to SGS mutants (853-855, 965-967, 966-968, 981-983, 1042-1044, 1096-  
482 1098 and 1107-1109) was inserted into the Sec31-NHis pFASTBacHTb construct using InFusion.

483 GUV budding reactions:

484 Giant unilamellar vesicles (GUVs) were prepared by electroformation (Angelova and Dimitrov, 1986)  
485 from 10 mg/mL of the “major-minor” lipid mixture (Ken Matsuoka et al., 1998) suspended in a 2:1  
486 chloroform:methanol solvent mix, as described previously (Hutchings et al., 2018). The mixture is  
487 spread over two Indium Tin Oxide (ITO)-coated glass slides, which are sandwiched with a silicon spacer  
488 to create a chamber that is then filled with 300 mM sucrose. An alternating voltage of 10 Hz and 3 V  
489 (rms) was applied for 6-8 hours using copper tape attached to the ITO-coated slides. GUVs were  
490 harvested by gentle aspiration from the chamber and applied to 500 µL of 300 mM glucose for gravity  
491 sedimentation overnight at 4°C. The supernatant was carefully aspirated and discarded to leave a ~30-  
492 50 µL GUV pellet the next day. GUVs were used within two days of harvesting.

493 For GUV budding reactions (BRs), COPII proteins were incubated at defined concentrations (1 µM  
494 Sar1p, 320 nM Sec23/24p, 173 nM Sec13/31p) with 1 mM GMP-PMP (Sigma-Aldrich), 2.5 mM EDTA  
495 (pH 8.0) and 10% GUVs (v/v). The same concentrations were used for BRs with mutant COPII  
496 components. Reactions were left at room temperature for 1-3 hours prior to negative stain or  
497 vitrification.

498 *Yeast strains and plasmids:*

499 Yeast strains and plasmids used in this study were all generated using standard molecular biology  
500 techniques. The yeast strains used were previously published: LMY1249 (*sec31::NAT pep4::TRP ade2-1*  
501 *his3-11 leu2-3,112 + [pYCp50::SEC31-URA3]*) described (Hutchings et al., 2018) and VSY015 (*sec31::NAT*  
502 *emp24::KANMX pep4::TRP ade2-1 his3-11 leu2-3,112 + [pYCp50::SEC31-URA3]*) described (Stancheva  
503 et al., 2020). Plasmids were introduced into yeast using standard LiAc transformation methods. Cultures  
504 were grown at 30°C in standard rich medium (YPD: 1% yeast extract, 2% peptone, and 2% glucose) or  
505 synthetic complete medium (SC: 0.67% yeast nitrogen base and 2% glucose supplemented with amino  
506 acids) as required. For testing viability, strains were grown to saturation in SC medium selecting for the  
507 mutant plasmid overnight at 30°C. 10-fold serial dilutions were made in 96 well trays before spotting  
508 onto 5FOA plates (1.675% yeast nitrogen base, 0.08% CSM, 2% glucose, 2% agar, 0.1% 5-fluoroorotic  
509 acid). Plates were scanned at day 2 or day 3 after spotting and growth at 30°C. The *SEC31* WT plasmid  
510 used in this study (VSB49) was described (Stancheva et al., 2020) and consists of *SEC31* PCR-amplified  
511 with native 500 bp upstream and downstream of the gene and cloned in BamHI/NotI sites of pRS313

512 (*HIS, CEN*; (Sikorski and Hieter, 1989)). Truncations were introduced by site-directed mutagenesis using  
513 the QuikChange system (Agilent) and Gibson Assembly (New England Biolabs) as per manufacturers'  
514 instructions to generate VSB146 (stop codon at position 1114) and VSB131 (deletion of Val2-Gln372).  
515 All experiments were repeated three times and a representative is shown.

#### 516 *Liposome binding:*

517 Liposome binding experiments were performed as described (Miller et al., 2002). Briefly, synthetic  
518 liposomes of "major/minor" composition (50 mol% phosphatidylcholine, 21 mol%  
519 phosphatidylethanolamine, 8 mol% phosphatidylserine, 5 mol% phosphatidic acid, 9 mol%  
520 phosphatidylinositol, 2.2 mol% phosphatidylinositol-4-phosphate, 0.8% mol% phosphatidylinositol-4,5-  
521 bisphosphate, 2 mol% cytidine-diphosphate-diacylglycerol, supplemented with 2 mol% TexasRed-  
522 phosphatidylethanolamine and 20% (w/w) ergosterol) were dried to a lipid film in a rotary evaporator  
523 and rehydrated in HKM buffer (20mM HEPES pH 7.0, 160mM KOAc, 1mM MgCl<sub>2</sub>). The lipid suspension  
524 was extruded 17 times through a polycarbonate filter of 0.4 μm pore size. Purified COPII components  
525 and lipids were mixed to final concentrations of 0.27mM liposomes, 15μg/ml Sar1, 20μg/ml  
526 Sec23/Sec24, 30μg/ml Sec13/Sec31 and 0.1mM nucleotide in 75μl HKM Buffer. Binding reactions were  
527 incubated for 30 min at 25°C. Each sample was mixed with 50μl 2.5M Sucrose-HKM, then 100μl  
528 transferred to an ultracentrifuge tube, overlaid with 100μl 0.75M Sucrose-HKM and 20μl HKM. The  
529 gradients were spun (100 000 rpm, 25 min, 24°C with slow acceleration/deceleration) in a Beckman  
530 TLA-100 rotor. The top 30μl of the gradients were collected and normalised for lipid recovery using  
531 Typhoon FLA 7000 scanner (GE). Samples were then resolved by SDS-PAGE and visualised using SYPRO  
532 Red staining. All experiments were repeated three times and a representative is shown.

#### 533 *Microsome budding assays:*

534 Microsomal membranes were prepared from yeast as described (Wuestehube and Schekman, 1992).  
535 Briefly, yeast cells were grown to mid-log phase in YPD (1% yeast extract, 2% peptone, and 2% glucose),  
536 harvested and resuspended in 100mM Tris pH 9.4/10mM DTT to 40 OD<sub>600</sub>/ml, then incubated at room  
537 temperature for 10 min. Cells were collected by centrifugation and resuspended to 40 OD<sub>600</sub>/ml in  
538 lyticase buffer (0.7M sorbitol, 0.75X YPD, 10mM Tris pH 7.4, 1mM DTT + lyticase 2μl/OD<sub>600</sub>), then  
539 incubated at 30°C for 30 min with gentle agitation. Cells were collected by centrifugation, washed once  
540 with 2X JR buffer (0.4M sorbitol, 100mM KOAc, 4mM EDTA, 40mM HEPES pH 7.4) at 100 OD<sub>600</sub>/ml, then  
541 resuspended in 2X JR buffer at 400 OD<sub>600</sub>/ml prior to freezing at -80°C. Spheroplasts were thawed on  
542 ice, and an equal volume of ice cold dH<sub>2</sub>O added prior to disruption with a motor-driven Potter Elvehjem  
543 homogenizer at 4°C. The homogenate was cleared by low speed centrifugation and crude membranes  
544 collected by centrifugation of the low-speed supernatant at 27,000 x g. The membrane pellet was  
545 resuspended in ~6mL of buffer B88 (20mM HEPES pH 6.8, 250mM sorbitol, 150mM KOAc, 5mM  
546 Mg(OAc)<sub>2</sub>) and loaded onto a step sucrose gradient composed of 1mL 1.5M sucrose in B88 and 1mL  
547 1.2M sucrose in B88. Gradients were subjected to ultracentrifugation at 190,000 x g for 1h at 4°C.  
548 Microsomal membranes were collected from the 1.2M/1.5M sucrose interface, diluted 10-fold in B88  
549 and collected by centrifugation at 27,000 x g. The microsomal pellet was resuspended in a small volume  
550 of B88 and aliquoted in 1mg total protein aliquots until use.

551 Budding reactions were performed as described (Miller et al., 2002). Briefly, 1mg of microsomal  
552 membranes per 6-8 reactions was washed 3x with 2.5 M urea in B88 and 3x with B88. Budding reactions  
553 were set up in B88 to a final volume of 250 μl at the following concentrations: 10μg/μl Sar1, 10μg/μl  
554 Sec23/Sec24, 20μg/μl Sec13/Sec31 and 0.1mM nucleotide. Where appropriate, an ATP regeneration  
555 mix was included (final concentration 1mM ATP, 50μM GDP-mannose, 40mM creatine phosphate,  
556 200μg/ml creatine phosphokinase). Reactions were incubated for 30 min at 25°C and a 12 μl aliquot  
557 collected as the total fraction. The vesicle-containing supernatant was collected after pelleting the  
558 donor membrane (15 000 rpm, 2 min, 4°C). Vesicle fractions were then collected by centrifugation in a  
559 Beckman TLA-55 rotor (50 000 rpm, 25 min, 4°C). The supernatant was aspirated, the pelleted vesicles  
560 resuspended in SDS sample buffer and heated for 10 min at 55°C with mixing. The samples were then



561 analysed by SDS-PAGE and immunoblotting for Sec22 (Miller lab antibody) and Erv46 (a gift from  
562 Charles Barlowe). All experiments were repeated three times and a representative is shown.

563 *EM sample preparation:*

564 For cryo-electron tomography:

565 4  $\mu\text{L}$  of the GUV COPII BR was applied to negatively glow-discharged C-flat holey carbon coated gold  
566 grids (CF-4/1-4AU, Electron Microscopy Sciences), blotted from both sides (60 seconds pre-blot wait,  
567 blot force setting five, and four second blot time) and plunge-frozen in 100% liquid ethane on a Vitrobot  
568 Mark IV (FEI) set to 4°C and 100% humidity. 3  $\mu\text{L}$  of BSA-blocked 5 nm gold nanoparticles (BBI Solutions)  
569 were added to a 30  $\mu\text{L}$  GUV BR and gently agitated just prior to vitrification. Vitrified grids were stored  
570 in liquid nitrogen dewars to await data collection.

571 For negative stain:

572 4  $\mu\text{L}$  of the GUV COPII BR was applied to negatively glow-discharged grids (Carbon film 300 Copper  
573 mesh, CF300-Cu), stained with 2% uranyl acetate, blotted with filter paper and air-dried at room  
574 temperature. Grids were imaged using either a Tecnai 120 keV TEM (T12) fitted with a CCD camera, or  
575 a Tecnai 200 keV TEM (F20) fitted with a DE20 detector (Direct Electron, San Diego). Unaligned and  
576 summed frames were collected for F20 images with a dose of 20-30  $\text{e}^-/\text{pixel}/\text{second}$ .

577 *Cryo-electron tomography data collection:*

578 For wild-type COPII GUV BRs, a total of 286 dose-symmetric tilt series (Hagen et al., 2017) with +/- 60°  
579 tilt range and 3° increments were acquired on Titan Krios operated at 300 keV in EFTEM mode with a  
580 Gatan Quantum energy filter (20 eV slit width) and K2 Summit direct electron detector (Gatan,  
581 Pleasanton CA) at ~1.33  $\text{\AA}/\text{pixel}$ . Data were collected at the ISMB EM facility in Birkbeck College and at  
582 the Cryo-EM Service Platform at EMBL Heidelberg. For  $\Delta\text{CTD-Sec31}$ , 47 dose-symmetric tilt series were  
583 collected at Birkbeck with a K3 direct detector (Gatan, Pleasanton CA) at ~1.38  $\text{\AA}/\text{pixel}$ . For all sessions,  
584 defocus was systematically varied between 1.5 and 4.5  $\mu\text{m}$  (Table 1). Data was collected automatically  
585 using SerialEM (Mastronarde, 2005) after manually selecting tubes using the AnchorMap procedure.  
586 Dose per tilt varied between 2.9 and 3.7  $\text{e}^-/\text{\AA}^2$ , equating to ~120 and ~150  $\text{e}^-/\text{\AA}^2$  in total respectively,  
587 depending on the dataset (Table 1).

588 *Cryo-tomography data processing:*

589 Tilt frames from Birkbeck were aligned using whole frame alignment with MotionCor2 (Zheng et al.,  
590 2017), which were amalgamated into ordered stacks. Tilt series were either aligned manually with  
591 IMOD or automatically with the Dynamo tilt series alignment (*dtssa*) pipeline (Castaño-Díez et al., 2012).  
592 Weighted back-projection (WBP) was used to reconstruct bin8x tomograms with 50 iterations of SIRT-  
593 like filtering for initial particle-picking and STA. CTF estimation was performed with CTFIND4 on a  
594 central rectangular region of the aligned and unbinned tilt series, as done previously (Hutchings et al.,  
595 2018). The uncropped, aligned and unbinned tilt series were dose-weighted using critical exposure  
596 values determined previously using custom MATLAB scripts (Grant and Grigorieff, 2015). 3D-CTF  
597 correction and tomogram reconstruction was performed using the novaCTF pipeline (Turoňová et al.,  
598 2017), with bin2x, bin4x and bin8x versions calculated using IMOD *binvol* (Kremer et al., 1996).

599 *Subtomogram averaging:*

600 All STA and subsequent analysis was performed using a combination of Dynamo (Castaño-Díez et al.,  
601 2012) and custom MATLAB scripts.

602 Inner coat:

603 Initial particle-picking for the inner coat was performed using previously established protocols  
604 (Hutchings et al., 2018; Zanetti et al., 2013). Briefly, tube axes were manually traced in IMOD to  
605 generate an oversampled lattice of cylindrical surface positions with angles assigned normal to the

606 surface. 32<sup>3</sup> voxel boxes were extracted from bin8x SIRT-like filtered tomograms for one round of initial  
607 reference-based alignments using a resampled and 50 Å low-pass filtered version of the inner coat  
608 reconstruction EMDB-0044 (Hutchings et al., 2018). Manual inspection of geometric markers using the  
609 UCSF Chimera placeObjects plug-in (Pettersen et al., 2004; Qu et al., 2018) confirmed convergence of  
610 oversampled coordinates onto the pseudo-helical inner coat lattice.

611 To rid outliers from the initial alignments, three strategies were used. Firstly, distance-based cleaning  
612 was applied using the Dynamo “separation in tomogram” parameter, set to four pixels. This avoids  
613 duplication of data points by identifying clusters of converged particles and selecting the one with the  
614 highest cross-correlation (CC) score. Secondly, particles were cleaned based on their matching lattice  
615 directionality. Initial alignments were conducted on a tube-by-tube basis using the Dynamo in-plane  
616 flip setting to search in-plane rotation angles 180° apart. This allowed to assign directionality to each  
617 tube, and particles that were not conforming to it were discarded by using the Dynamo  
618 *dtgrep\_direction* command in custom MATLAB scripts. Thirdly, manual CC-based thresholding was  
619 implemented to discard misaligned particles. As seen previously (Hutchings et al., 2018), particles on  
620 the tubule surface exhibited an orientation-dependent (Euler angle  $\theta$ ) CC score whereby top and  
621 bottom views had lower CC values. These were reweighted using the same polynomial fit for  $\theta$  versus  
622 CC (MATLAB fit with option ‘poly2’) as described previously for more convenient thresholding. The  
623 cleaned initial coordinates were then combined and divided into half datasets for independent  
624 processing thereon.

625 Subsequent STA progressed through successive binning scales of 3DCTF-corrected tomograms, from  
626 bin8x to 4x, 2x then unbinned. At each level, angular and translational searches were reduced, with the  
627 low-pass filter determined by the Fourier shell correlation (FSC) 0.5 cut-off between the two half-maps.  
628 A saddle-shaped mask mimicking the curvature of the membrane at the height of the inner coat layer  
629 was used throughout. A total of 151,176 particles contributed to the map.

630 Half maps were used for density modification using Phenix (Terwilliger et al., 2020). The same mask  
631 used for alignments was imposed, and the density modification procedure was carried out without  
632 reducing the box size. All other parameters were used as default. After density modification, the map  
633 was further sharpened using the ‘autosharpen’ option in Phenix (Liebschner et al., 2019).

634 Outer coat:

635 To target the sparser outer coat lattice for STA, we used the refined coordinates of the inner coat to  
636 locate the outer coat tetrameric vertices. Oversampled coordinates for the outer coat were obtained  
637 by radially shifting refined inner coat coordinates by eight pixels further away from the membrane,  
638 following initial alignments from SIRT-like filtered tomograms (Supplementary Fig. 1B). 64<sup>3</sup> voxel boxes  
639 were extracted from bin8x SIRT-like filtered tomograms for one round of initial reference-based  
640 alignments using a resampled and 50 Å low-pass filtered version of the outer coat tetrameric vertex  
641 reconstruction EMDB-2429 (Zanetti et al., 2013). Again, manual inspection of positions and orientations  
642 with the placeObject plug-in confirmed conformity to the expected lozenge-shaped outer coat lattice  
643 (Supplementary Fig. 1). Moreover, density for the neighbouring outer coat vertices emerged outside of  
644 the alignment mask and template, suggesting these initial alignments are not suffering from reference  
645 bias. The cleaned initial coordinates were then combined and divided into half datasets for independent  
646 processing thereon. The rhomboidal lattice can be appreciated by plotting the frequency of  
647 neighbouring particles for each vertex in the STA dataset (Supplementary Fig. 1D, left panel). Analysis  
648 of the relative positions between the inner coat and outer vertex did not reveal any defined spatial  
649 relationship (Supplementary Fig. 1D, right panel).

650 Subsequent STA progressed through successive binning scales of 3DCTF-corrected tomograms, from  
651 bin8x to 4x, to 2x, for a final pixel size of 2.654 Å. At each level, angular and translational searches were  
652 reduced, with the low-pass filter determined by the Fourier shell correlation (FSC) 0.5 cut-off between  
653 the two half-maps. A mask mimicking the curvature of the outer coat layer was used throughout. Prior  
654 to sharpening of the final unbinned map using relion ‘postprocessing’, the final half dataset averages  
655 were amplitude-weighted according to the sum of the combined CTFs.

656 The refined positions of vertices were used to extract two distinct datasets of left and right-handed  
657 rods respectively using the dynamo sub-boxing feature. Left-handed rods were processed as vertices,  
658 except that a cylindrical mask was used during alignments. Right handed rods were subjected to  
659 classification in dynamo using multi-reference alignments. One class contained canonical rods, and  
660 particles belonging to this class were further processed as above. Two classes which contained the extra  
661 rod attachment were combined after applying a 180° in-plane rotation to particles in one class. After  
662 that, processing was carried out as for the other subtomograms.

663 The number of particles that contributed to outer coat averages is reported in Table 1.

664 Sec31- $\Delta$ CTD outer coat rods:

665 Oversampled coordinates for the outer coat were obtained in the same way as the WT dataset. Initial  
666 alignments using the previously resolved tetrameric vertex (EMDB-2429) did not produce lattice  
667 patterns conforming to the expected lozenge-shape as judged from the placeObjects inspection. This  
668 was confirmed by the subtomogram neighbour analysis for the refined initial alignment coordinates.  
669 Furthermore, the resulting average did not reveal new features emerging outside of the mask or initial  
670 reference. To confirm that Sec31- $\Delta$ CTD rods lack the appendage seen in the WT rod maps, we instead  
671 performed initial alignments against a rod without handedness. For this, the final left-handed rod from  
672 the WT dataset was taken and rigid body fitted with the crystal structure (PDB 4bzk) in UCSF Chimera  
673 (Pettersen et al., 2004) to generate a 30 Å *molmap*. This was duplicated, mirror-symmetrised with the  
674 flipZ command in Chimera, and rotated along the axis of the rod by 180°, and summed with the original  
675 molmap using *vopMaximum* to create a Sec13/31 rod without handedness. This was used as a template  
676 for initial alignments, keeping Dynamo parameters consistent with vertex alignments at the same stage.  
677 This resulted in a rod which regained the original handedness of Sec13/31, suggesting no reference  
678 bias. To clean the dataset of misaligned particles, MRA with five classes and no shifts or rotations  
679 allowed was performed for 100 iterations. Two stable classes comprising ~90% of the data emerged as  
680 recognisable Sec13/31 rods. Refinement of each of these selected classes against a wild type left-  
681 handed rod gave averages that lacked the putative CTD appendage.

682 The procedure was repeated independently for two half datasets for resolution assessment.

683 Subtomogram neighbour analysis:

684 To provide a semi-quantitative readout for the degree of lattice order, neighbour plots were calculated  
685 and used in a similar way to previous STA studies (Kovtun et al., 2020, 2018). Briefly, all neighbouring  
686 particles are identified within a user-defined distance on a particle-by-particle basis. The relative  
687 orientation and distance to the matched particle is used to fill the relevant pixel in a master volume  
688 relative to its centre, which accumulates into a volume of integers. The final volumes are divided by the  
689 number of searched particles and normalised to a maximum intensity of one. For convenient  
690 visualisation, pixels in Z were summed to create heatmap representations (Supplementary Fig 1D). This  
691 heatmap reflects the frequency of neighbouring particles and in a well-ordered lattice, peaks are visible.  
692 Furthermore, this master volume retains matched particle pairings, and can be masked to select  
693 specific relationships in the dataset (Supplementary Fig. 6C).

694 Outer coat in spherical vesicles and cages:

695 Vesicles and cages were identified, and vertices manually picked from gaussian filtered binned x8  
696 volumes using UCSF Chimera (Pettersen et al., 2004). Initial orientations were assigned normal to the  
697 vesicle or cage centre, and the in-plane rotation angle was randomised. Vertices were then aligned for  
698 one iteration to the relevant starting reference (Supplementary Fig. 4), searching out of plane angles  
699 within a cone and the full in plane rotation range.

700 *Fitting and interpretation:*

701 The map output from phenix.resolve\_cryoem (Terwilliger et al., 2020) and the further sharpened map  
702 were used to provide guidance for model building.

703 Crystal structures of Sec23 (2QTV), Sec24 (1PCX), Sar1 (2QTV), Tango1 (5KYW) and Sec31 active peptide  
704 (2QTV) were fitted to the reconstruction using UCSF Chimera (Pettersen et al., 2004) and Coot (Emsley  
705 et al., 2010).

706 Two copies of each protein were placed, representing two protomeric assemblies. Clashes between  
707 Sec23 from adjacent protomers were resolved by manual rebuilding. Clear density was also observed  
708 for residues 201-217 of Sec23, 363-371 and 463-466 of Sec24, and 157-159 of Sar1, and were manually  
709 built as they were absent from the crystal structures.

710 The model was refined with phenix.real\_space\_refine against the sharpened map, and validated with  
711 phenix.validation\_cryoem (dev 3885) (Table 3).

#### 712 *Homology modelling:*

713 Sec31 residues 481-1273 (encompassing PRD and CTD regions) was used to search for remote  
714 homologues using the HHpred server (Zimmermann et al., 2018), and identifying SRA1 as the closest  
715 homologue in the PDB database (PDB 2MGX, E-value 2.3E-15). To confirm the homology, the Sec31  
716 protein sequence (Uniprot id: P38968) was used to search the CATH database of functional families  
717 (Sillitoe et al., 2015), generating a significant hit to a Sec31 CTD functional family (E-value 6.0E-48).  
718 SRA1 matched this family with an E-value of 0.0001, which is within the threshold for homology  
719 modelling using functional family matches, based on previous benchmarks (Lam et al., 2017).

720 Homology models of Sec31 CTD were built using a combination of HHpred and Modeller (Webb and  
721 Sali, 2017), based on the highest-ranking homologue structure of SRA1 (Bilinovich et al., 2014).  
722 According to calculations from proSA web-server (Wiederstein and Sippl, 2007), the model has a z-score  
723 of -6.07, similar to that of the template (-5.38), and in line with that of all experimentally determined  
724 structures.

725

726 Tables:

727 Table 1: Data collection parameters

|                                          | WT COPII (1)                                                                     | WT COPII (2)                                                                     | $\Delta$ CTD                                                                                 |
|------------------------------------------|----------------------------------------------------------------------------------|----------------------------------------------------------------------------------|----------------------------------------------------------------------------------------------|
| Grids                                    | C-flat holey carbon coated gold grids (CF-4/1-4AU, Electron Microscopy Sciences) | C-flat holey carbon coated gold grids (CF-4/1-4AU, Electron Microscopy Sciences) | Lacey Carbon film, 200 Copper, (S166-3, Agar Scientific)                                     |
| Cryo-specimen freezing                   | Vitrobot Mark IV                                                                 | Vitrobot Mark IV                                                                 | Leica EM GP                                                                                  |
| Electron microscope                      | Titan Krios, EMBL                                                                | Titan Krios, Birkbeck                                                            | Titan Krios, Birkbeck                                                                        |
| Detector                                 | K2 direct detector, Gatan                                                        | K2 direct detector, Gatan                                                        | K3 direct detector, Gatan                                                                    |
| Datasets                                 | 1                                                                                | 1                                                                                | 1                                                                                            |
| Micrographs (used in processing)         | 137 tomograms                                                                    | 149 tomograms                                                                    | 47 tomograms                                                                                 |
| Voltage (keV)                            | 300                                                                              |                                                                                  |                                                                                              |
| GIF energy filter slit width (eV)        | 20                                                                               |                                                                                  |                                                                                              |
| Electron exposure ( $e^-/\text{\AA}^2$ ) | ~ 120                                                                            | ~ 150                                                                            | ~ 120                                                                                        |
| Sampling interval                        | 1.33 $\text{\AA}/\text{pixel}$                                                   | 1.327 $\text{\AA}/\text{pixel}$                                                  | 0.69 $\text{\AA}/\text{pixel}$ (superresolution), 1.38 $\text{\AA}/\text{pixel}$ 2x2 binned. |
| Exposure time                            | 0.25 sec frame / 0.75 sec total                                                  | 0.1 sec frame / 1 sec total                                                      | 0.08 sec frame / 0.4 sec total                                                               |
| Defocus range                            | -1.5 to -4.5 $\mu\text{m}$                                                       | -1.5 to -4.5 $\mu\text{m}$                                                       | -1.5 to -3.5 $\mu\text{m}$                                                                   |
| Defocus determination                    | CTFFIND4                                                                         |                                                                                  |                                                                                              |
|                                          |                                                                                  |                                                                                  |                                                                                              |

728

729 Table 2: 3D STA reconstructions and model refinement

|                          | Inner coat       | Outer coat      |                 |                  |                             |
|--------------------------|------------------|-----------------|-----------------|------------------|-----------------------------|
|                          |                  | Vertex          | Left-handed rod | Right-handed rod | Right-handed rod with extra |
| Particle box size        | 196              | 128             | 128             | 128              | 128                         |
| Number of particles used | 151,176          | 14,099          | 16455           | 7958             | 7195                        |
| Initial map generation   | Dynamo           | Dynamo          | Dynamo          | Dynamo           | Dynamo                      |
| Map refinement           | Dynamo           | Dynamo          | Dynamo          | Dynamo           | Dynamo                      |
| Resolution               | 4.6 $\text{\AA}$ | 12 $\text{\AA}$ | 11 $\text{\AA}$ | 13 $\text{\AA}$  | 15 $\text{\AA}$             |

730

731 Table3: refinement statistics for the inner coat

|                                                |       |
|------------------------------------------------|-------|
| Model composition                              |       |
| Protein residues                               | 3413  |
| No. Ligands                                    | 8     |
| Protein atoms                                  | 26852 |
| Ligand atoms                                   | 70    |
| Model Resolution @ FSC 0.5 (Å)                 | 4.7   |
| Map CC (mask)                                  | 0.716 |
| Average B-factor (all atoms) (Å <sup>2</sup> ) | 158.4 |
| RMS deviations – Bonds (Å)                     | 0.01  |
| RMS deviations – Angles (deg)                  | 1.52  |
| Molprobrity Score                              | 2.18  |
| Clashscore                                     | 13.11 |
| Ramachandran plot (%)                          |       |
| Favoured                                       | 89.7  |
| Allowed                                        | 10.1  |
| Outlier                                        | 0.21  |
| C-beta deviations (%)                          | 0.00  |
| Rotamer Outliers (%)                           | 0.07  |

732

## 733 Supplementary Figure Legends

734 *Supplementary Figure 1. Overview of subtomogram averaging.*

735 A. A typical view of GUV budding on grids. Scale bar 1µm.

736 B. Workflow for extraction of outer coat subtomograms. Top: aligned inner coat subunits arrange in a  
737 lattice. Middle: radially shifted coordinates from inner coat lattice points are used to extract outer coat  
738 particles. This oversamples the outer coat lattice. Bottom: alignments of outer coat particles with large  
739 shift in their xy plane but restricted shifts in the z direction leads to finding outer coat subunit  
740 accurately, as shown by the outer coat lattice pattern. This strategy was necessary to avoid the high-  
741 signal inner coat to bias the alignments.

742 C. Left panel: the starting reference is shown overlaid with the mask used. Right panel: the average  
743 obtained after one iteration clearly shows continuous density outside the mask, including neighbouring  
744 vertices and underlying smeared inner coat layer, indicative of genuine alignments.

745 D. Left panel: plot of the positions of neighbouring vertices to each aligned vertex shows the expected  
746 pattern. Right panel: plot of neighbouring inner coat subunits with respect to each vertex does not  
747 show any pattern, indicating the two coat layers are disordered with respect to each other. Scale bar  
748 50 nm.

749 *Supplementary Figure 2. Resolution of subtomogram averages.*

750 A. Fourier Shell Correlation between independently processed half maps for the outer coat structures,  
751 colours as indicated in the legend. Line indicating FSC=0.143 is drawn.

752 B. Fourier Shell Correlation between independently processed half maps for the inner coat.

753 *Supplementary Figure 3. Vertex interaction between Sec31 N-terminal  $\beta$ -propellers.*

754 A. A bottom view of the vertex reconstruction (outlined transparent white), with fitted models (Sec31  
755 in dark red and orange, and Sec13 in grey). In the model, the N-terminal residues are highlighted in  
756 blue, and the stubs of an acidic loop missing from the X-ray structures are highlighted in green. The  
757 difference map between the subtomogram average and the model is shown in green, and is consistent  
758 with being occupied by the acidic loop.

759 B. *In vitro* budding experiments using yeast microsomal membranes incubated with Sar1, Sec23/Sec24,  
760 Sec13 with the indicated mutant of Sec31, and the indicated nucleotides. Vesicle release from the  
761 donor membrane is measured by detecting incorporation of COPII cargo proteins, Sec22 and Erv46,  
762 into a slowly sedimenting vesicle fraction. When the NTD of Sec31 is missing, no budding is detected.

763 C. Flotation assays measure recruitment of COPII proteins to buoyant liposomes. Sec31- $\Delta$ NTD is  
764 recruited with similar efficiency to wild type Sec31, indicating that the budding and viability defects are  
765 not due to low recruitment levels.

766 D. Negatively stained GUV budding reconstitutions with Sec31 deleted of its N-terminal  $\beta$ -propeller  
767 domain show

768 tubulation and ordered inner coat lattice. Scale bar 100 nm.

769 E. Anti-Sec31 Western Blot of the 5-FOA derived SEC31 and sec31- $\Delta$ NTD strains showing that the  
770 expected size of Sec31 variants is present in the surviving cells.

771 F. Comparison of the vertex reconstructed from coated membrane tubules (this study), with that of  
772 cages obtained in the absence of membranes (Noble et al., 2013). The '-' protomers are in dark red,  
773 and the '+' protomers are shown in orange and blue respectively.

774 G. The fitted atomic models were superimposed on a '-' Sec31 protomer, and the relative positions of  
775 the neighbouring '+' protomers are overlapped, highlighting the differences between the two  
776 architectures.

777 *Supplementary Figure 4. Vertices on round vesicles and empty cages are hollow.*

778 A. 79 vertices were manually picked from spherical vesicles, and aligned against starting references  
779 originated either from a low-pass filtered version of the vertex obtained from tubules, or to the vertex  
780 of soluble cages obtained through in vitro assembly in the absence of membranes. In both cases,  
781 averages show a hollow architecture, more similar to the vertex arrangement we see on membrane  
782 tubules. Places vertex confirm the alignments are correct.

783 B. As in A, but 205 vertices were manually picked from membrane-less cages that were found in the  
784 cryo-tomograms as by-products of budding reactions. Scale bar 50 nm.

785 *Supplementary Figure 5. Sec31 CTD characterisation.*

786 A. Secondary structure predictions of Sec31 CTD indicate the presence of a folded domain, consisting  
787 mainly of  $\alpha$ -helices.

788 B. A homology model for the Sec31 CTD was built based on SRA1, a mammalian homologue. The  
789 homology model was fitted to the appendage density and shows consistency of features.

790 C. Side by side comparison of the homology model of the CTD with the SRA1 template used.

791 D. As in Supplementary Fig. 4C. When Sec31 CTD is missing, weak budding is detected with non-  
792 hydrolysable GTP analogues but not with GTP.

793 E. As in Supplementary Fig. 4E. Sec31- $\Delta$ CTD is efficiently recruited to membranes, indicating the  
794 functional defects are not a consequence of low recruitment levels.

795 *Supplementary Figure 6. Analysis of extra rods connecting between right-handed rods.*

796 A. Right handed rods after the first round of alignments (bin x 8) showed prominent extra density.

797 B. After classification, a class emerged of right-handed rods which had a structured domain attached  
798 to the dimerization interface, resembling a tandem of  $\beta$ -propeller domains of Sec13-31 rods. Sub-  
799 boxing was performed by extracting particles at the predicted centre of the extra rods, and  
800 subtomogram averaging and subsequent alignments clearly converged into a Sec13-31 rod structure.

801 C. The plotted position of vertices neighbouring the extra rods. Given the extra rods position within the  
802 outer coat lattice (green line), vertices are predicted to position at the corners of a rhombus (dotted  
803 pink lines). An extra peak was detected in the neighbour plot, which corresponds to the tip of the extra  
804 rod (red circle).

805 D. Selecting and averaging extra rod particles based on masks on the neighbour plot clearly shows that  
806 some of these rods are connected to a right-handed rod on one side, and a vertex on the other.

807 E. Rods selected in D (green) were placed together with the canonical rods and vertices (dark pink and  
808 red, respectively), showing that they bridge between patches of mismatched outer coat lattice.

809 *Supplementary Figure 7. Inner coat subtomogram averaging.*

810 A. Overview of the sharpened map, with the central subunit coloured according to the model.

811 B. The X-ray-based model of Sec23, Sec24 and Sar1 was refined in the map, as detailed in the methods.

812 C. A close up view of the model in the core of Sar1, showing clear separation of  $\beta$ -strands and density  
813 for the bound nucleotide.

814 D. Disorder prediction of the Sec23 region around the L-loop (inset), as done with the PSIPRED server  
815 (Buchan and Jones, 2019; Jones and Cozzetto, 2015).

816 E. Alignment between human Sec23A and B paralogues shows very high conservation throughout the  
817 proteins, aside of a short region corresponding to the L-loop.

818



## 819 Acknowledgements

820 We thank Euan Pyle and Natasha Lukoyanova for comments on the manuscript. We thank Natasha  
821 Lukoyanova at the ISMB Birkbeck cryo-EM lab, and Wim Hagen at the EMBL cryo-EM facility in  
822 Heidelberg for cryo-tomography data collection, Tom Terwilliger at Los Alamos National Laboratory for  
823 advice on density modification procedures, and Christine Orengo and Natalie Dawson for help with  
824 Sec31 CTD bioinformatics analysis. **Funding:** This work was supported by grants from the Academy of  
825 Medical Sciences (Springboard award SBF0031030), the ERC (StG 852915 – CRYTOCOP) and the BBSRC  
826 (BB/T002670/1) to GZ, the UK Medical Research Council (MRC\_UP\_1201/10) to EAM and the Wellcome  
827 Trust (102535/Z/13/Z) to ACMC. Cryo-EM data for this investigation were collected at Birkbeck College,  
828 University of London, with financial support from the Wellcome Trust (202679/Z/16/Z and  
829 206166/Z/17/Z), and at the Cryo-EM Service Platform at EMBL Heidelberg.

830 **Author contributions:** Conceptualization: GZ, JH; Funding acquisition: GZ, EAM; **Investigation:** Sample  
831 preparation: JH, NRB; cryo-tomography data collection: JH; cryo-tomography and subtomogram  
832 averaging data processing: JH, GZ; yeast viability and microsome budding assays: VS, EAM; model  
833 building and refinement: AC. **Writing:** original draft: GZ, JH; review and editing: all authors. **Data and**  
834 **materials availability:** We have deposited the EM maps and models to the Electron Microscopy and  
835 Protein Data Banks with accession codes: EMD-11193,11194,11197,11198,11199,11264 and PDB  
836 6ZG5,6ZG6,6ZGA,6ZL0.

837 **Competing interests:** The authors declare no competing interests.

## 838 References

- 839 Angelova MI, Dimitrov DS. 1986. Liposome Electro formation. *Faraday Discuss Chem SOC* **81**:303–311.  
840 doi:10.1039/dc9868100303
- 841 Antonny B, Madden D, Hamamoto S, Orci L, Schekman R. 2001. Dynamics of the COPII coat with GTP  
842 and stable analogues. *Nature Cell Biology* **3**:531–537. doi:10.1038/35078500
- 843 Bacia K, Futai E, Prinz S, Meister A, Daum S, Glatte D, Briggs JAG, Schekman R. 2011. Multibudded  
844 tubules formed by COPII on artificial liposomes. *Sci Rep* **1**:17. doi:10.1038/srep00017
- 845 Barlowe C, Orci L, Yeung T, Hosobuchi M, Hamamoto S, Salama N, Rexach MF, Ravazzola M, Amherdt  
846 M, Schekman R. 1994. COPII: a membrane coat formed by Sec proteins that drive vesicle  
847 budding from the endoplasmic reticulum. *Cell* **77**:895–907.
- 848 Bi X, Corpina RA, Goldberg J. 2002. Structure of the Sec23/24-Sar1 pre-budding complex of the COPII  
849 vesicle coat. *Nature* **419**:271–277. doi:10.1038/nature01040
- 850 Bi X, Mancias JD, Goldberg J. 2007. Insights into COPII coat nucleation from the structure of Sec23.Sar1  
851 complexed with the active fragment of Sec31. *Dev Cell* **13**:635–645.  
852 doi:10.1016/j.devcel.2007.10.006
- 853 Bilinovich SM, Davis CM, Morris DL, Ray LA, Prokop JW, Buchan GJ, Leeper TC. 2014. The C-Terminal  
854 Domain of SRA1p Has a Fold More Similar to PRP18 than to an RRM and Does Not Directly Bind  
855 to the SRA1 RNA STR7 Region. *Journal of Molecular Biology* **426**:1753–1765.  
856 doi:10.1016/j.jmb.2014.01.007
- 857 Bonifacino JS, Glick BS. 2004. The Mechanisms of Vesicle Budding and Fusion. *Cell* **116**:153–166.  
858 doi:10.1016/S0092-8674(03)01079-1
- 859 Boyadjiev SA, Fromme JC, Ben J, Chong SS, Nauta C, Hur DJ, Zhang G, Hamamoto S, Schekman R,  
860 Ravazzola M, Orci L, Eyaid W. 2006. Cranio-lenticulo-sutural dysplasia is caused by a SEC23A  
861 mutation leading to abnormal endoplasmic-reticulum-to-Golgi trafficking. *Nat Genet* **38**:1192–  
862 1197. doi:10.1038/ng1876
- 863 Buchan DWA, Jones DT. 2019. The PSIPRED Protein Analysis Workbench: 20 years on. *Nucleic Acids Res*  
864 **47**:W402–W407. doi:10.1093/nar/gkz297

- 865 Castaño-Díez D, Kudryashev M, Arbeit M, Stahlberg H. 2012. Dynamo: A flexible, user-friendly  
866 development tool for subtomogram averaging of cryo-EM data in high-performance computing  
867 environments. *Journal of Structural Biology* **178**:139–151. doi:10.1016/j.jsb.2011.12.017
- 868 Čopič A, Latham CF, Horlbeck MA, D’Arcangelo JG, Miller EA. 2012. ER Cargo Properties Specify a  
869 Requirement for COPII Coat Rigidity Mediated by Sec13p. *Science* **335**:1359–1362.  
870 doi:10.1126/science.1215909
- 871 Dokudovskaya S, Williams R, Devos D, Sali A, Chait BT, Rout MP. 2006. Protease Accessibility Laddering:  
872 A Proteomic Tool for Probing Protein Structure. *Structure* **14**:653–660.  
873 doi:10.1016/j.str.2006.02.006
- 874 Emsley P, Lohkamp B, Scott WG, Cowtan K. 2010. Features and development of Coot. *Acta Crystallogr*  
875 *D Biol Crystallogr* **66**:486–501. doi:10.1107/S0907444910007493
- 876 Fath S, Mancias JD, Bi X, Goldberg J. 2007. Structure and organization of coat proteins in the COPII cage.  
877 *Cell* **129**:1325–1336. doi:10.1016/j.cell.2007.05.036
- 878 Fromme JC, Ravazzola M, Hamamoto S, Al-Balwi M, Eyaid W, Boyadjiev SA, Cosson P, Schekman R, Orci  
879 L. 2007. The genetic basis of a craniofacial disease provides insight into COPII coat assembly.  
880 *Dev Cell* **13**:623–634. doi:10.1016/j.devcel.2007.10.005
- 881 Ghaemmaghami S, Huh W-K, Bower K, Howson RW, Belle A, Dephoure N, O’Shea EK, Weissman JS.  
882 2003. Global analysis of protein expression in yeast. *Nature* **425**:737–741.  
883 doi:10.1038/nature02046
- 884 Gorur A, Yuan L, Kenny SJ, Baba S, Xu K, Schekman R. 2017. COPII-coated membranes function as  
885 transport carriers of intracellular procollagen I. *J Cell Biol* **216**:1745–1759.  
886 doi:10.1083/jcb.201702135
- 887 Grant T, Grigorieff N. 2015. Measuring the optimal exposure for single particle cryo-EM using a 2.6 Å  
888 reconstruction of rotavirus VP6. *eLife* **4**:e06980. doi:10.7554/eLife.06980
- 889 Hagen WJH, Wan W, Briggs JAG. 2017. Implementation of a cryo-electron tomography tilt-scheme  
890 optimized for high resolution subtomogram averaging. *Journal of Structural Biology* **197**:191–  
891 198. doi:10.1016/j.jsb.2016.06.007
- 892 Hutchings J, Stancheva V, Miller EA, Zanetti G. 2018. Subtomogram averaging of COPII assemblies  
893 reveals how coat organization dictates membrane shape. *Nature Communications* **9**:4154.  
894 doi:10.1038/s41467-018-06577-4
- 895 Hutchings J, Zanetti G. 2019. Coat flexibility in the secretory pathway: a role in transport of bulky  
896 cargoes. *Current Opinion in Cell Biology* **59**:104–111. doi:10.1016/j.ceb.2019.04.002
- 897 Jin L, Pahuja KB, Wickliffe KE, Gorur A, Baumgärtel C, Schekman R, Rape M. 2012. Ubiquitin-dependent  
898 regulation of COPII coat size and function. *Nature* **482**:495–500. doi:10.1038/nature10822
- 899 Jones DT, Cozzetto D. 2015. DISOPRED3: precise disordered region predictions with annotated protein-  
900 binding activity. *Bioinformatics* **31**:857–863. doi:10.1093/bioinformatics/btu744
- 901 Kovtun O, Dickson VK, Kelly BT, Owen David J, Briggs JAG. 2020. Architecture of the AP2:clathrin coat on  
902 the membranes of clathrin-coated vesicles. *bioRxiv* 2020.01.28.922591.  
903 doi:10.1101/2020.01.28.922591
- 904 Kovtun O, Leneva N, Bykov YS, Ariotti N, Teasdale RD, Schaffer M, Engel BD, Owen DJ, Briggs JAG, Collins  
905 BM. 2018. Structure of the membrane-assembled retromer coat determined by cryo-electron  
906 tomography. *Nature* **561**:561–564. doi:10.1038/s41586-018-0526-z
- 907 Kremer JR, Mastronarde DN, McIntosh JR. 1996. Computer visualization of three-dimensional image  
908 data using IMOD. *Journal of Structural Biology* **116**:71–76. doi:10.1006/jsbi.1996.0013
- 909 Krissinel E, Henrick K. 2007. Inference of macromolecular assemblies from crystalline state. *J Mol Biol*  
910 **372**:774–797. doi:10.1016/j.jmb.2007.05.022
- 911 Lam SD, Das S, Sillitoe I, Orengo C. 2017. An overview of comparative modelling and resources  
912 dedicated to large-scale modelling of genome sequences. *Acta Crystallogr D Struct Biol* **73**:628–  
913 640. doi:10.1107/S2059798317008920

- 914 Lee MCS, Orci L, Hamamoto S, Futai E, Ravazzola M, Schekman R. 2005. Sar1p N-terminal helix initiates  
915 membrane curvature and completes the fission of a COPII vesicle. *Cell* **122**:605–617.  
916 doi:10.1016/j.cell.2005.07.025
- 917 Liebschner D, Afonine PV, Baker ML, Bunkóczi G, Chen VB, Croll TI, Hintze B, Hung L-W, Jain S, McCoy  
918 AJ, Moriarty NW, Oeffner RD, Poon BK, Prisant MG, Read RJ, Richardson JS, Richardson DC,  
919 Sammito MD, Sobolev OV, Stockwell DH, Terwilliger TC, Urzhumtsev AG, Videau LL, Williams  
920 CJ, Adams PD. 2019. Macromolecular structure determination using X-rays, neutrons and  
921 electrons: recent developments in Phenix. *Acta Cryst D* **75**:861–877.  
922 doi:10.1107/S2059798319011471
- 923 Ma W, Goldberg J. 2016. TANGO1/cTAGE5 receptor as a polyvalent template for assembly of large COPII  
924 coats. *PNAS* **113**:10061–10066. doi:10.1073/pnas.1605916113
- 925 Malhotra V, Erlmann P. 2015. The Pathway of Collagen Secretion. *Annual Review of Cell and*  
926 *Developmental Biology* **31**:109–124. doi:10.1146/annurev-cellbio-100913-013002
- 927 Mastronarde DN. 2005. Automated electron microscope tomography using robust prediction of  
928 specimen movements. *Journal of Structural Biology* **152**:36–51. doi:10.1016/j.jsb.2005.07.007
- 929 Matsuoka K., Orci L, Amherdt M, Bednarek SY, Hamamoto S, Schekman R, Yeung T. 1998. COPII-coated  
930 vesicle formation reconstituted with purified coat proteins and chemically defined liposomes.  
931 *Cell* **93**:263–275.
- 932 Matsuoka Ken, Orci L, Amherdt M, Bednarek SY, Hamamoto S, Schekman R, Yeung T. 1998. COPII-  
933 coated vesicle formation reconstituted with purified coat proteins and chemically defined  
934 liposomes. *Cell* **93**:263–275. doi:10.1016/S0092-8674(00)81577-9
- 935 Miller E, Antony B, Hamamoto S, Schekman R. 2002. Cargo selection into COPII vesicles is driven by  
936 the Sec24p subunit. *The EMBO Journal* **21**:6105–6113. doi:10.1093/emboj/cdf605
- 937 Miller EA, Beilharz TH, Malkus PN, Lee MCS, Hamamoto S, Orci L, Schekman R. 2003. Multiple cargo  
938 binding sites on the COPII subunit Sec24p ensure capture of diverse membrane proteins into  
939 transport vesicles. *Cell* **114**:497–509. doi:10.1016/s0092-8674(03)00609-3
- 940 Mossessova E, Bickford LC, Goldberg J. 2003. SNARE selectivity of the COPII coat. *Cell* **114**:483–495.
- 941 Noble AJ, Zhang Q, O'Donnell J, Hariri H, Bhattacharya N, Marshall AG, Stagg SM. 2013. A pseudoatomic  
942 model of the COPII cage obtained from cryo-electron microscopy and mass spectrometry.  
943 *Nature Structural & Molecular Biology* **20**:167–173. doi:10.1038/nsmb.2467
- 944 Paraan M, Bhattacharya N, Uversky VN, Stagg SM. 2018. Flexibility of the Sec13/31 cage is influenced  
945 by the Sec31 C-terminal disordered domain. *J Struct Biol* **204**:250–260.  
946 doi:10.1016/j.jsb.2018.08.016
- 947 Pettersen EF, Goddard TD, Huang CC, Couch GS, Greenblatt DM, Meng EC, Ferrin TE. 2004. UCSF  
948 Chimera - A visualization system for exploratory research and analysis. *Journal of*  
949 *Computational Chemistry* **25**:1605–1612. doi:10.1002/jcc.20084
- 950 Qu K, Glass B, Doležal M, Schur FKM, Murciano B, Rein A, Rumlová M, Ruml T, Kräusslich H-G, Briggs  
951 JAG. 2018. Structure and architecture of immature and mature murine leukemia virus capsids.  
952 *Proceedings of the National Academy of Sciences* **115**:E11751–E11760.  
953 doi:10.1073/pnas.1811580115
- 954 Saito K, Chen M, Bard F, Chen S, Zhou H, Woodley D, Polischuk R, Schekman R, Malhotra V. 2009.  
955 TANGO1 facilitates cargo loading at endoplasmic reticulum exit sites. *Cell* **136**:891–902.  
956 doi:10.1016/j.cell.2008.12.025
- 957 Santos AJM, Nogueira C, Ortega-Bellido M, Malhotra V. 2016. TANGO1 and Mia2/cTAGE5 (TALI)  
958 cooperate to export bulky pre-chylomicrons/VLDLs from the endoplasmic reticulum. *J Cell Biol*  
959 **213**:343–354. doi:10.1083/jcb.201603072
- 960 Sikorski RS, Hieter P. 1989. A system of shuttle vectors and yeast host strains designed for efficient  
961 manipulation of DNA in *Saccharomyces cerevisiae*. *Genetics* **122**:19–27.
- 962 Sillitoe I, Lewis TE, Cuff A, Das S, Ashford P, Dawson NL, Furnham N, Laskowski RA, Lee D, Lees JG,  
963 Lehtinen S, Studer RA, Thornton J, Orengo CA. 2015. CATH: comprehensive structural and

- 964 functional annotations for genome sequences. *Nucleic Acids Res* **43**:D376-381.  
965 doi:10.1093/nar/gku947
- 966 Stagg SM, Gürkan C, Fowler DM, LaPointe P, Foss TR, Potter CS, Carragher B, Balch WE. 2006. Structure  
967 of the Sec13/31 COPII coat cage. *Nature* **439**:234–238. doi:10.1038/nature04339
- 968 Stagg SM, LaPointe P, Razvi A, Gürkan C, Potter CS, Carragher B, Balch WE. 2008. Structural basis for  
969 cargo regulation of COPII coat assembly. *Cell* **134**:474–484. doi:10.1016/j.cell.2008.06.024
- 970 Stancheva VG, Li X-H, Hutchings J, Gomez-Navarro N, Santhanam B, Babu MM, Zanetti G, Miller EA.  
971 2020. Combinatorial multivalent interactions drive cooperative assembly of the COPII coat. *J*  
972 *Cell Biol* **219**. doi:10.1083/jcb.202007135
- 973 Terwilliger TC, Ludtke SJ, Read RJ, Adams PD, Afonine PV. 2020. Improvement of cryo-EM maps by  
974 density modification. *bioRxiv* 845032. doi:10.1101/845032
- 975 Townley AK, Feng Y, Schmidt K, Carter DA, Porter R, Verkade P, Stephens DJ. 2008. Efficient coupling of  
976 Sec23-Sec24 to Sec13-Sec31 drives COPII-dependent collagen secretion and is essential for  
977 normal craniofacial development. *J Cell Sci* **121**:3025–3034. doi:10.1242/jcs.031070
- 978 Turoňová B, Schur FKM, Wan W, Briggs JAG. 2017. Efficient 3D-CTF correction for cryo-electron  
979 tomography using NovaCTF improves subtomogram averaging resolution to 3.4 Å. *Journal of*  
980 *Structural Biology* **199**:187–195. doi:10.1016/j.jsb.2017.07.007
- 981 Venditti R, Scanu T, Santoro M, Di Tullio G, Spaar A, Gaibisso R, Beznoussenko GV, Mironov AA, Mironov  
982 A, Zelante L, Piemontese MR, Notarangelo A, Malhotra V, Vertel BM, Wilson C, De Matteis MA.  
983 2012. Sedlin controls the ER export of procollagen by regulating the Sar1 cycle. *Science*  
984 **337**:1668–1672. doi:10.1126/science.1224947
- 985 Webb B, Sali A. 2017. Protein Structure Modeling with MODELLER. *Methods Mol Biol* **1654**:39–54.  
986 doi:10.1007/978-1-4939-7231-9\_4
- 987 Wiederstein M, Sippl MJ. 2007. ProSA-web: interactive web service for the recognition of errors in  
988 three-dimensional structures of proteins. *Nucleic Acids Res* **35**:W407-410.  
989 doi:10.1093/nar/gkm290
- 990 Wuestehube LJ, Schekman RW. 1992. Reconstitution of transport from endoplasmic reticulum to Golgi  
991 complex using endoplasmic reticulum-enriched membrane fraction from yeast. *Meth Enzymol*  
992 **219**:124–136. doi:10.1016/0076-6879(92)19015-x
- 993 Zanetti G, Pahuja KB, Studer S, Shim S, Schekman R. 2012. COPII and the regulation of protein sorting  
994 in mammals. *Nature Cell Biology* **14**:20–28. doi:10.1038/ncb2390
- 995 Zanetti G, Prinz S, Daum S, Meister A, Schekman R, Bacia K, Briggs JAG. 2013. The structure of the COPII  
996 transport-vesicle coat assembled on membranes. *Elife* **2**:e00951. doi:10.7554/eLife.00951
- 997 Zheng SQ, Palovcak E, Armache J-P, Verba KA, Cheng Y, Agard DA. 2017. MotionCor2: anisotropic  
998 correction of beam-induced motion for improved cryo-electron microscopy. *Nature Methods*  
999 **14**:331–332. doi:10.1038/nmeth.4193
- 1000 Zimmermann L, Stephens A, Nam S-Z, Rau D, Kübler J, Lozajic M, Gabler F, Söding J, Lupas AN, Alva V.  
1001 2018. A Completely Reimplemented MPI Bioinformatics Toolkit with a New HHpred Server at  
1002 its Core. *Journal of Molecular Biology, Computation Resources for Molecular Biology* **430**:2237–  
1003 2243. doi:10.1016/j.jmb.2017.12.007
- 1004

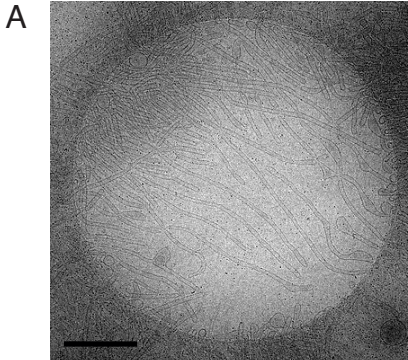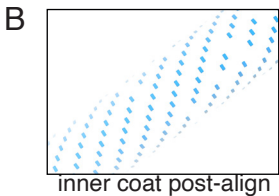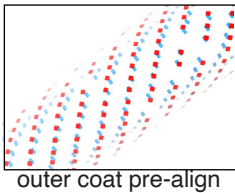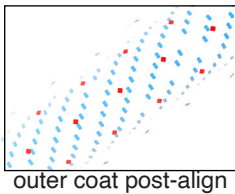

**C** Reference

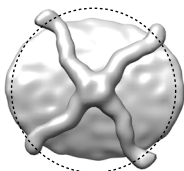

EMD-2429

Average

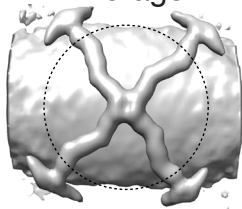

**D** vertex-vertex

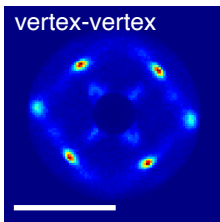

vertex-inner

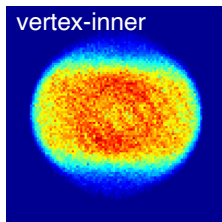

0 0.2 0.4 0.6 0.8 1 Frequency

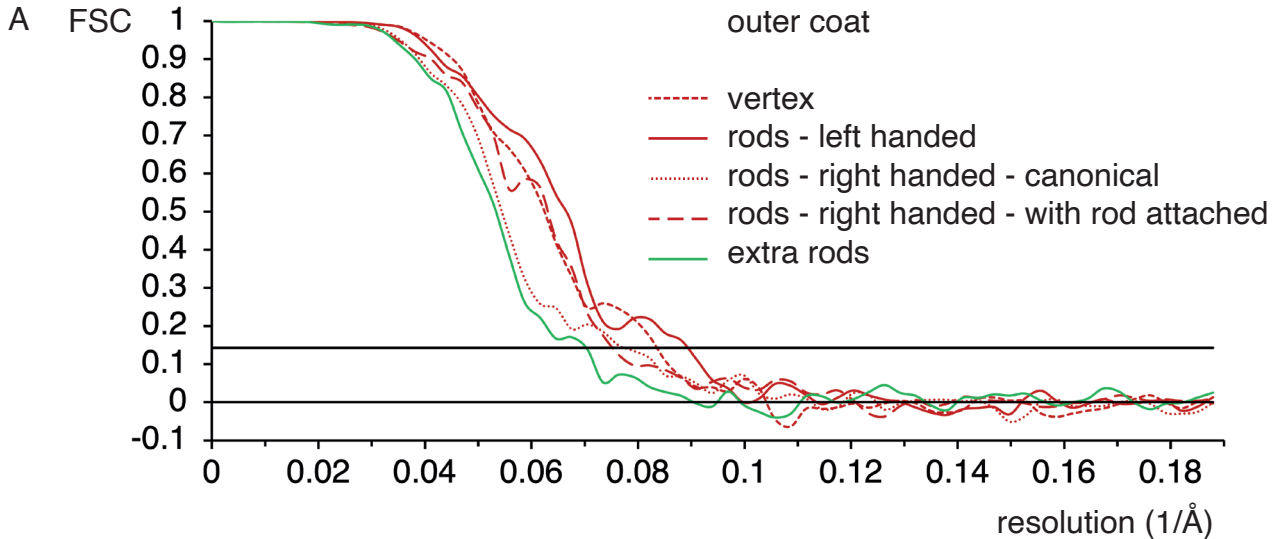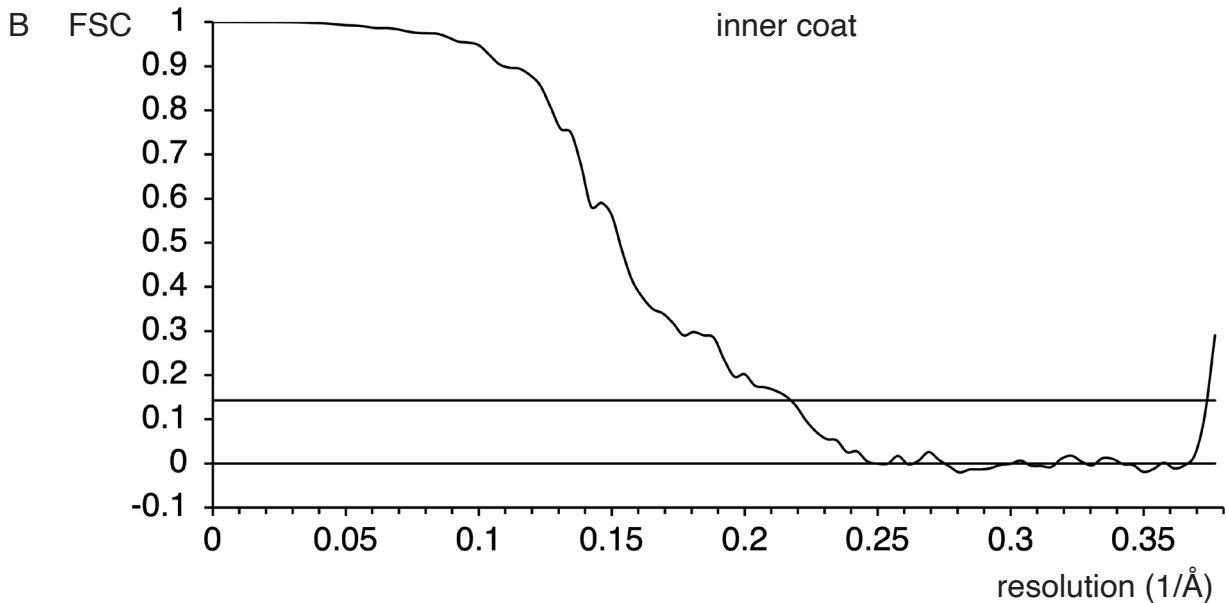

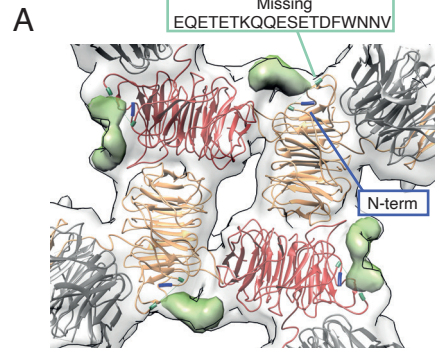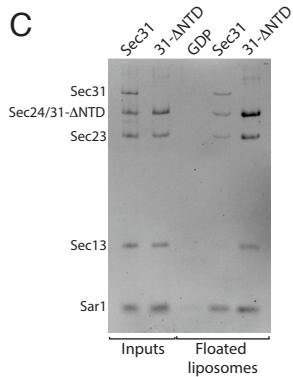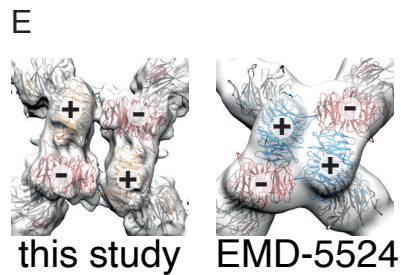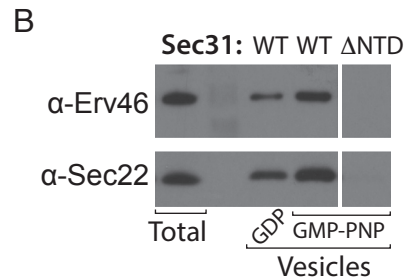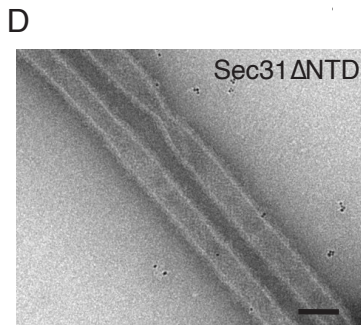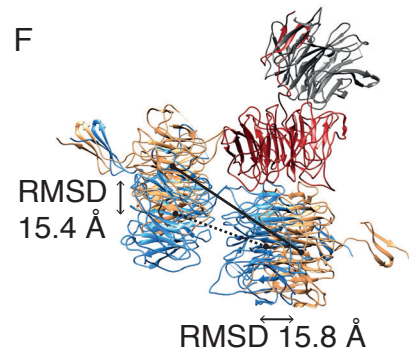

tomogram slices

starting references

averages

placed vertices

A

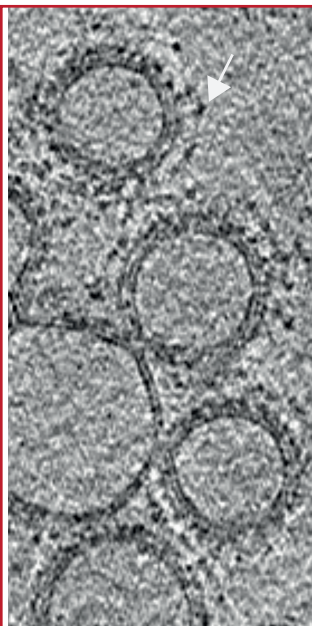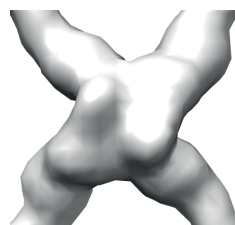

EMD-5524

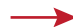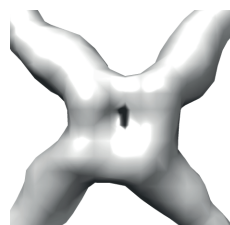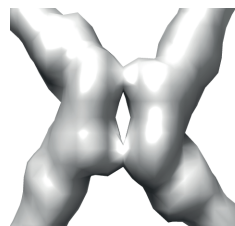

this study

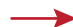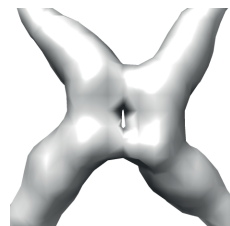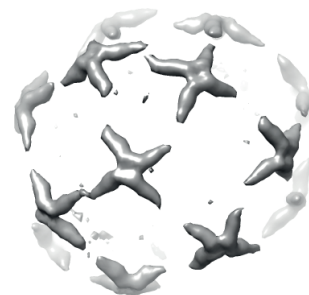

B

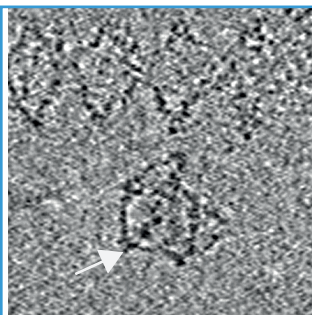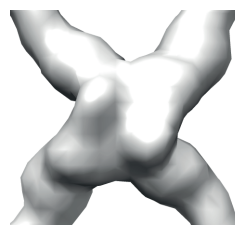

EMD-5524

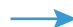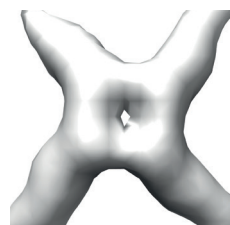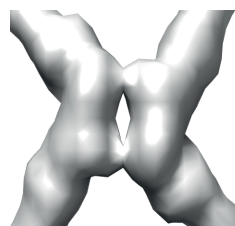

this study

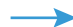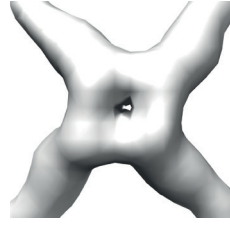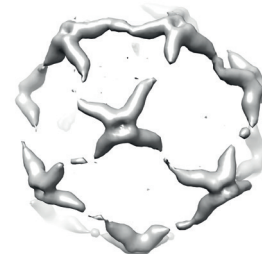





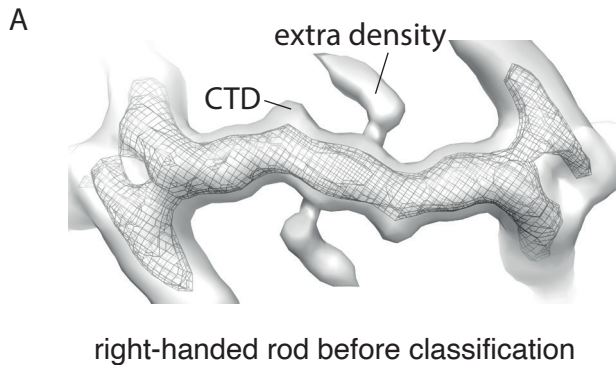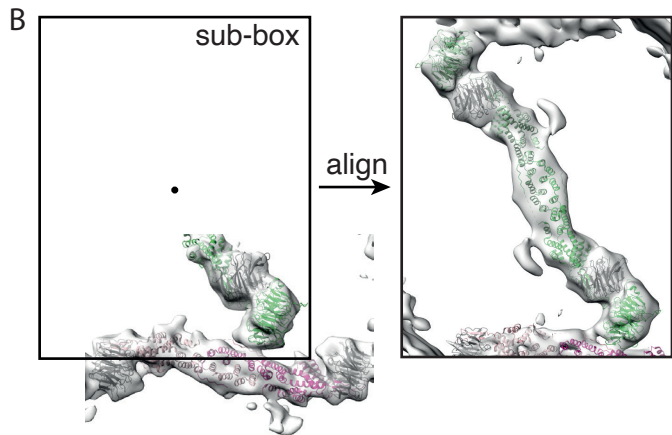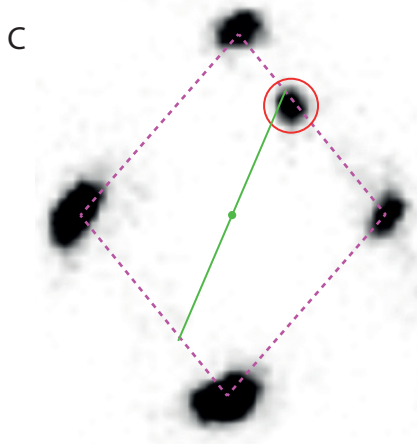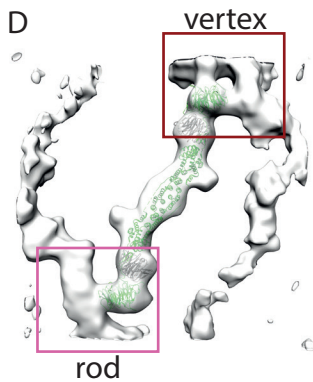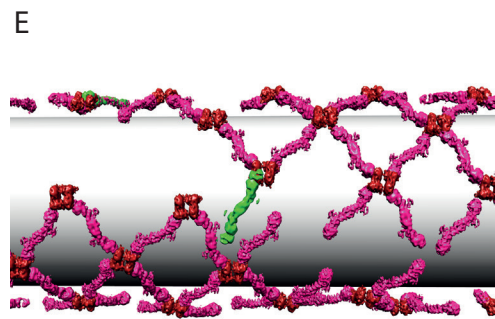

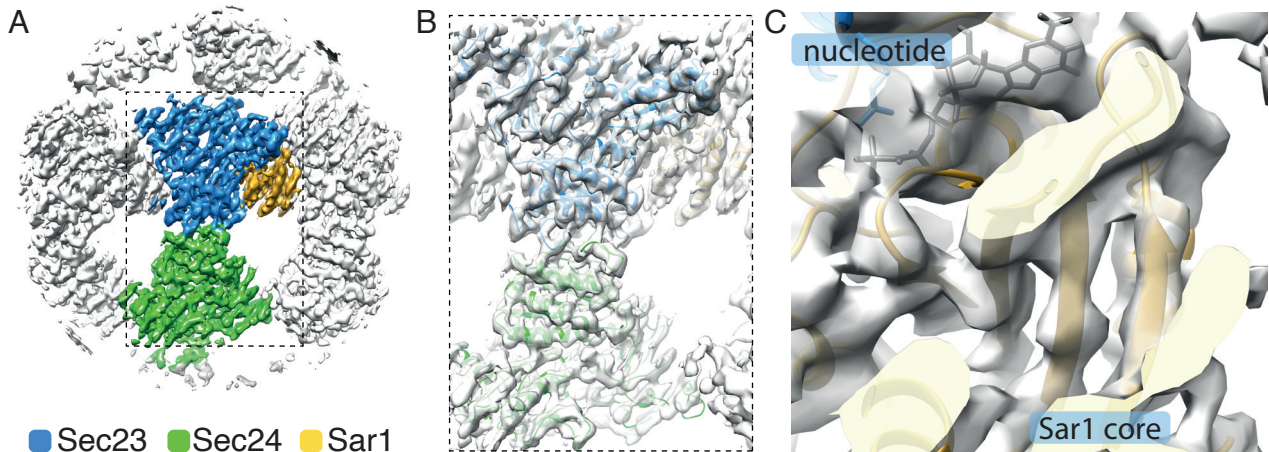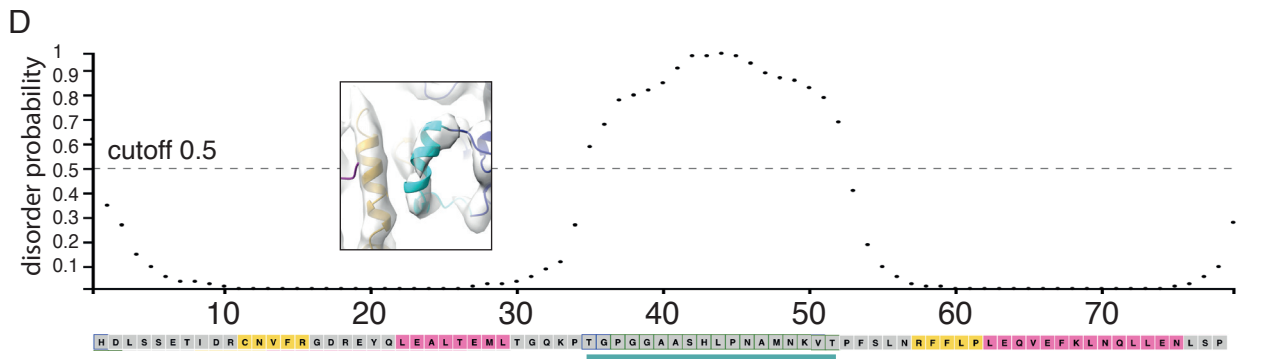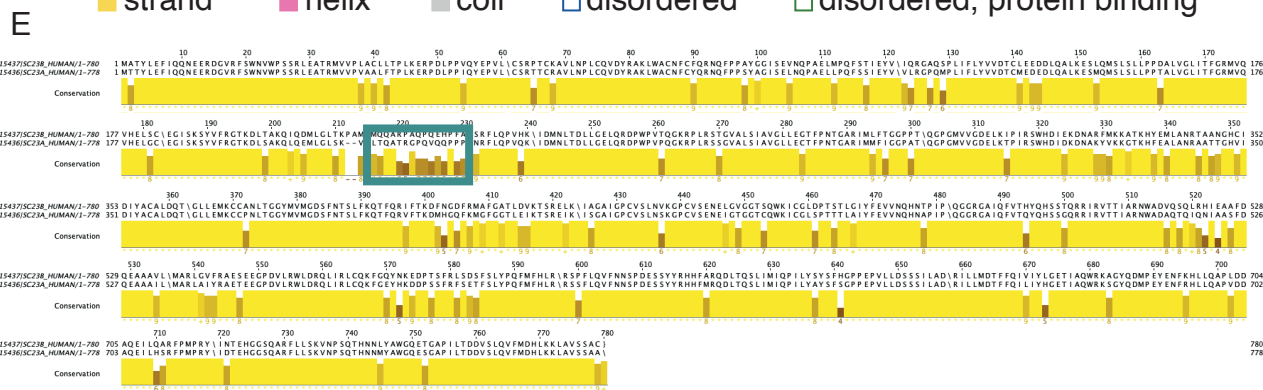

Source: https://www.biorxiv.org/content/10.1101/2020.06.18.159608v3.full.pdf
